# Supplementary material
Source: publisher figshare collection journal article supplement (https://tandf.figshare.com/ndownloader/files/18513614)
Supplement: Supplementary file 1 [file 18513614]

One-Pot, Three-Component Synthesis of Pyrido[2,3-*d*]pyrimidinones Using Aluminate Sulfonic Acid Nanocatalyst Under Grinding Technique

Fathy M. Abdelrazek1,4*, Sobhi M. Gomha1,2, Mohamed S. Farghaly1,3, Peter Metz4

1. Chemistry Department, Faculty of Science, Cairo University, Giza 12613, Egypt
2. Department of Chemistry, Faculty of Science, Islamic University in Almadinah Almonawara, Almadinah Almonawara, 42351, Saudi Arabia
3. Science & Technology Center of Excellence, Ministry of Military Production, Cairo, Egypt
4. Fakultat Chemie und Lebensmittelchemie, TU-Dresden, 01069 Dresden, Germany

E mails: [prof.fmrazek@gmail.com](mailto:prof.fmrazek@gmail.com), [s.m.gomha@gmail.com](mailto:s.m.gomha@gmail.com)


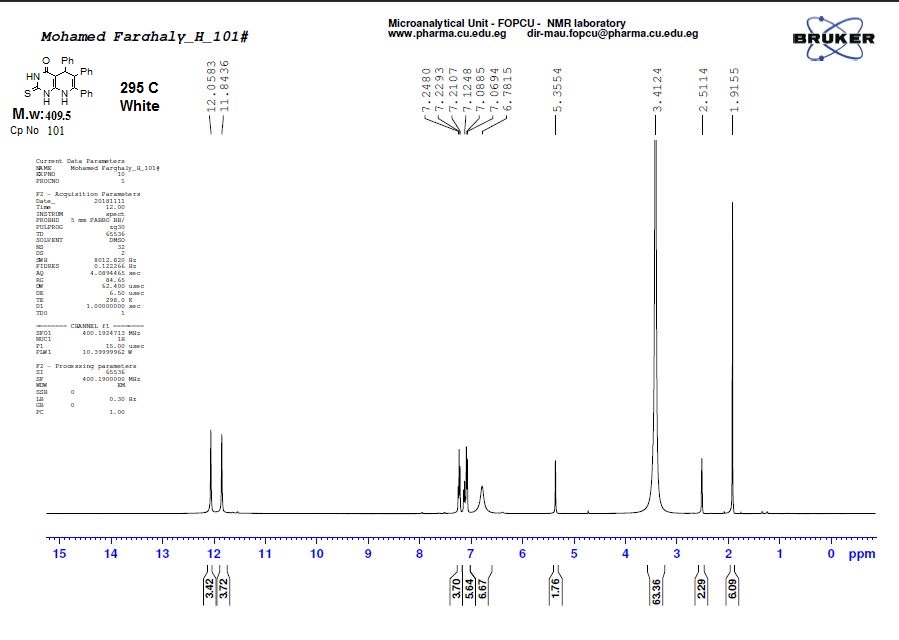


1HNMR of compound **4a**

**
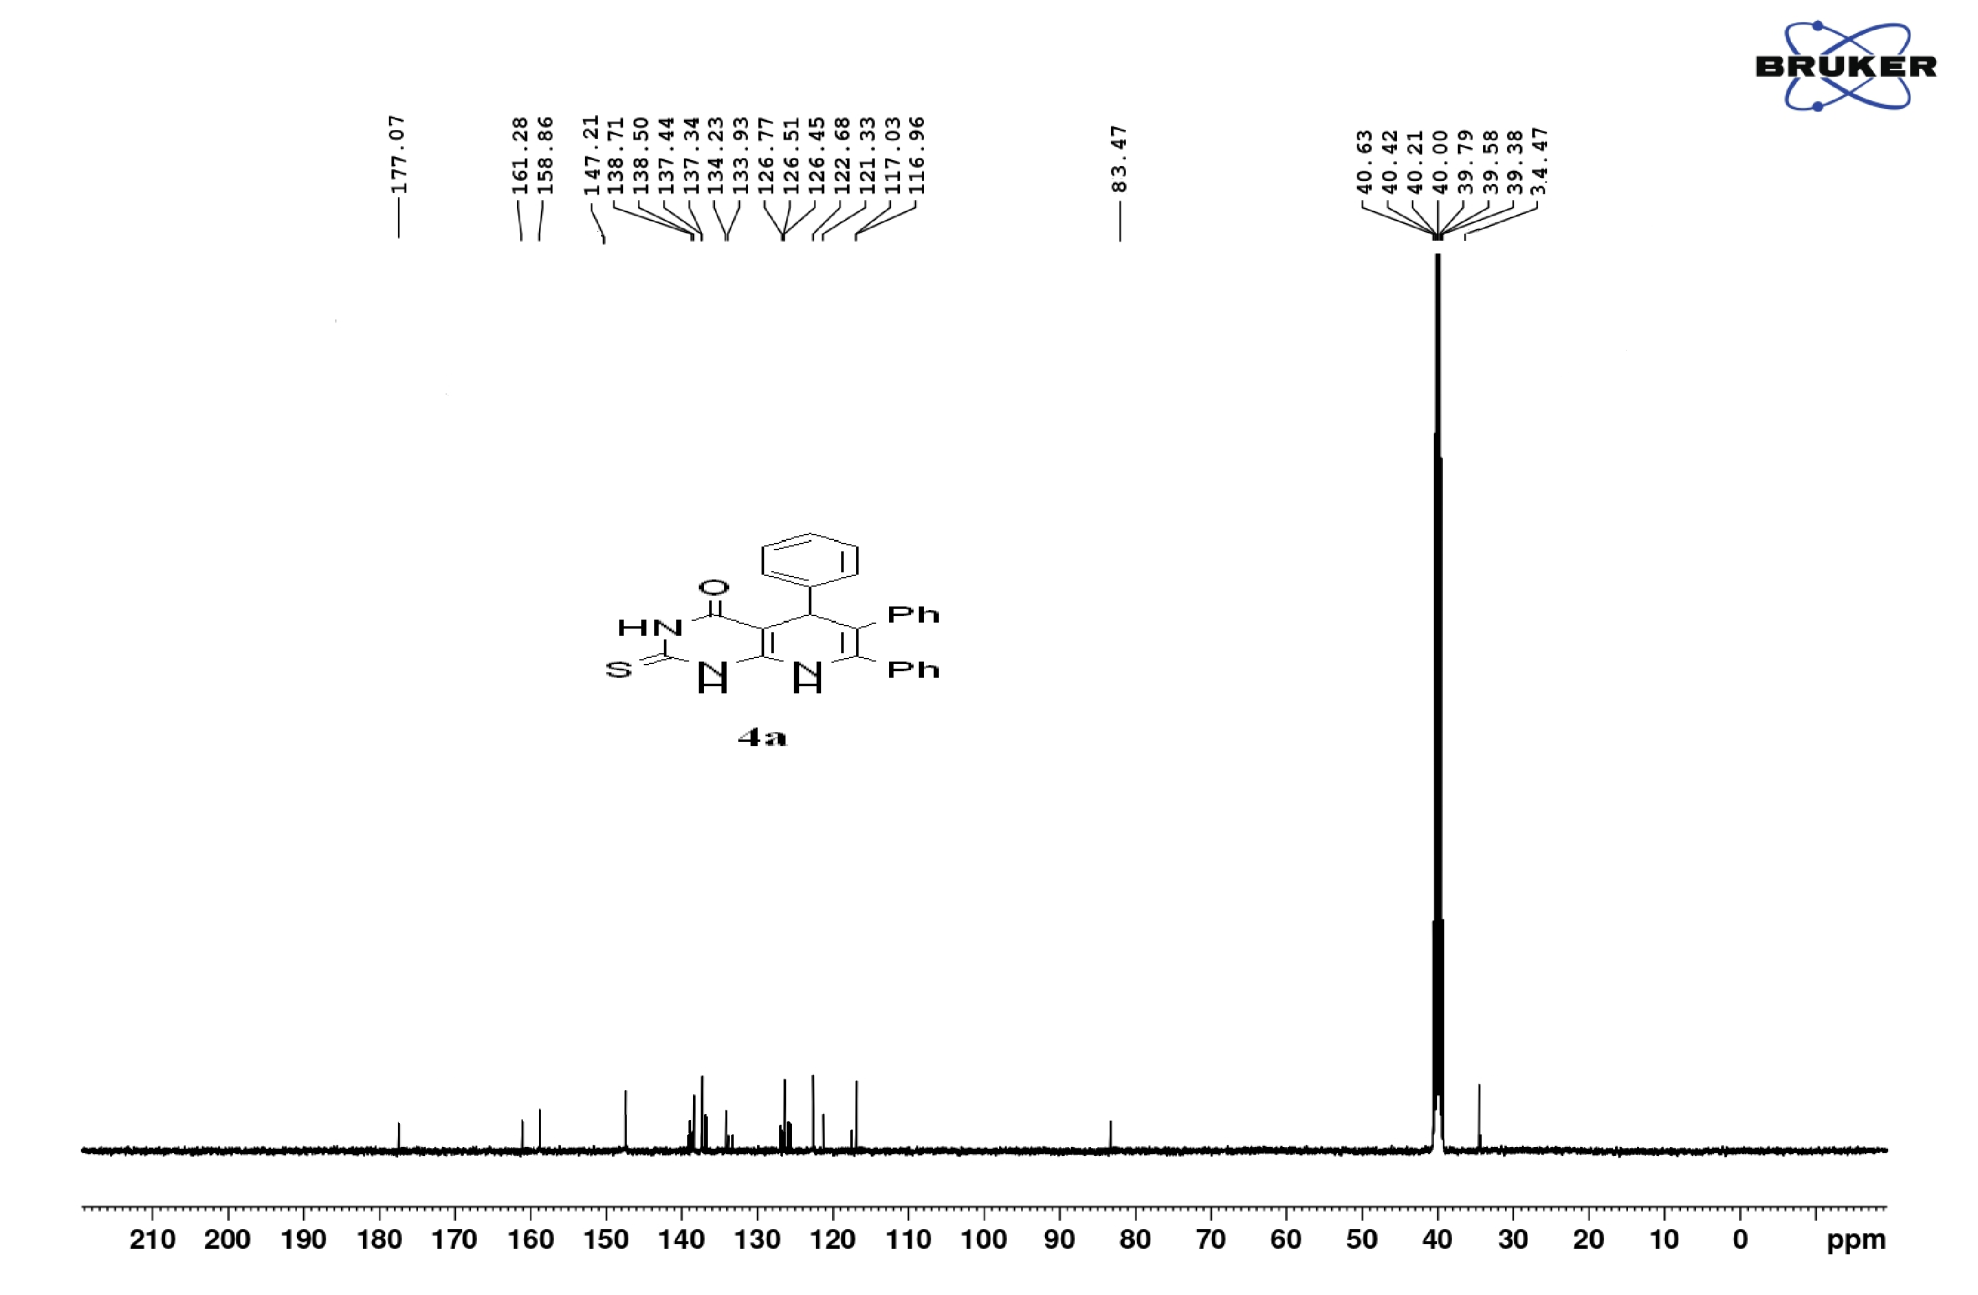
**

13CNMR of compound **4a**


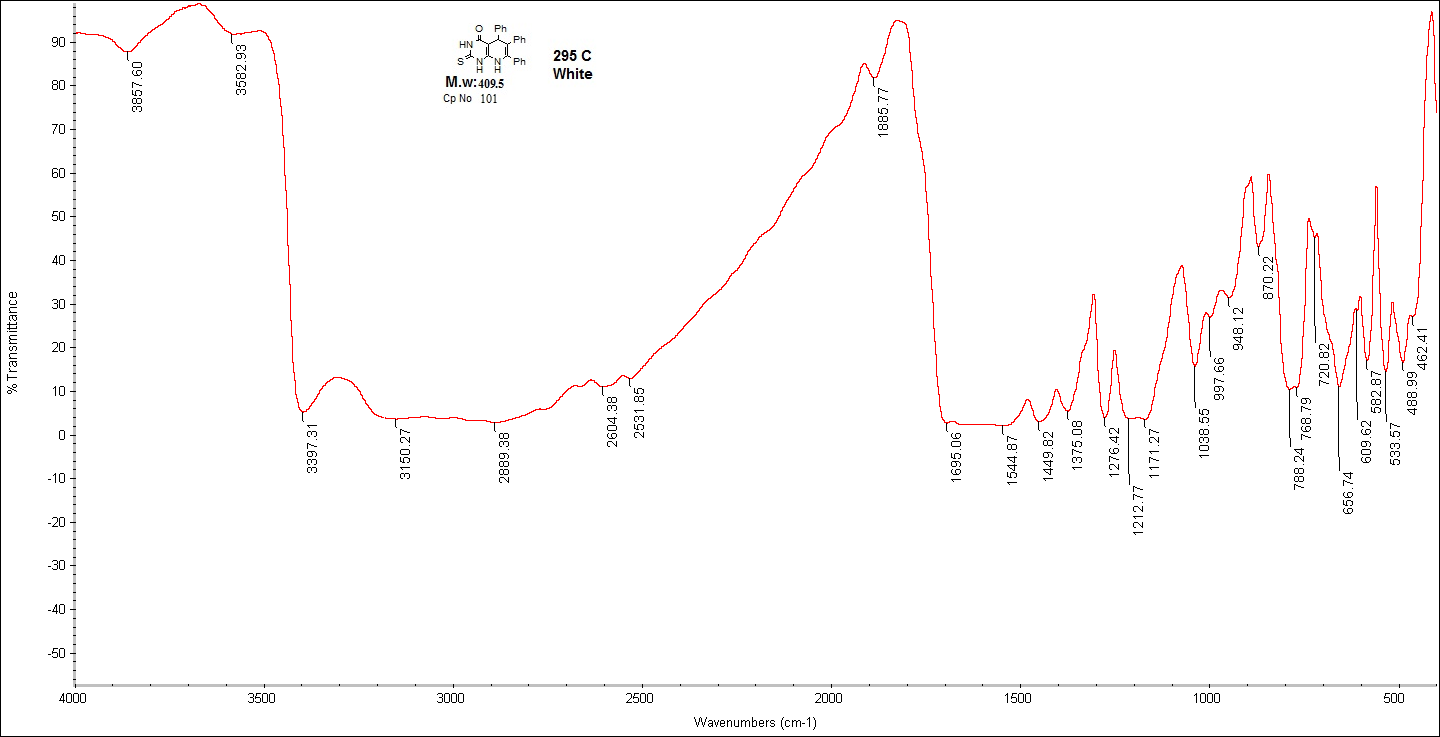


IR of compound **4a**

**
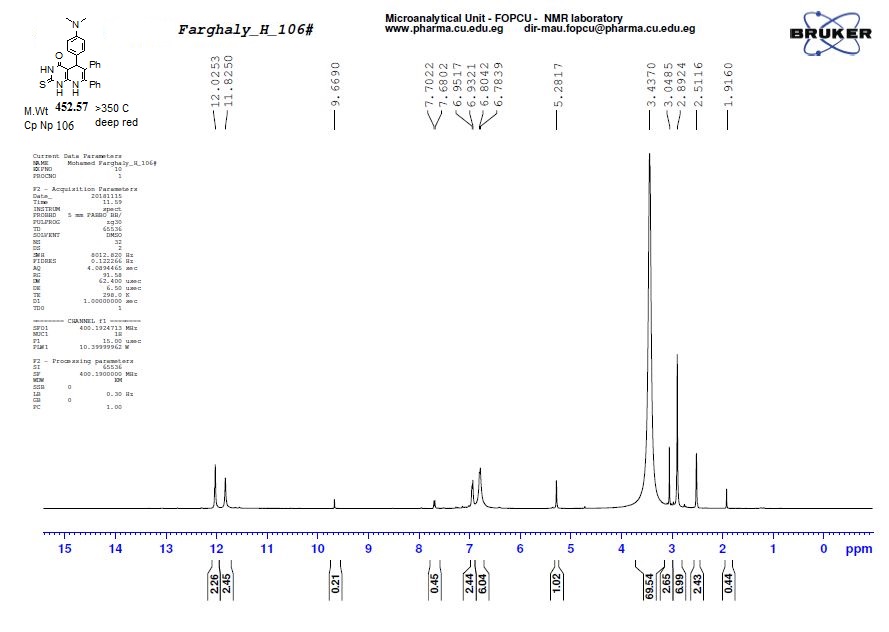
**

1HNMR of compound **4c**

**
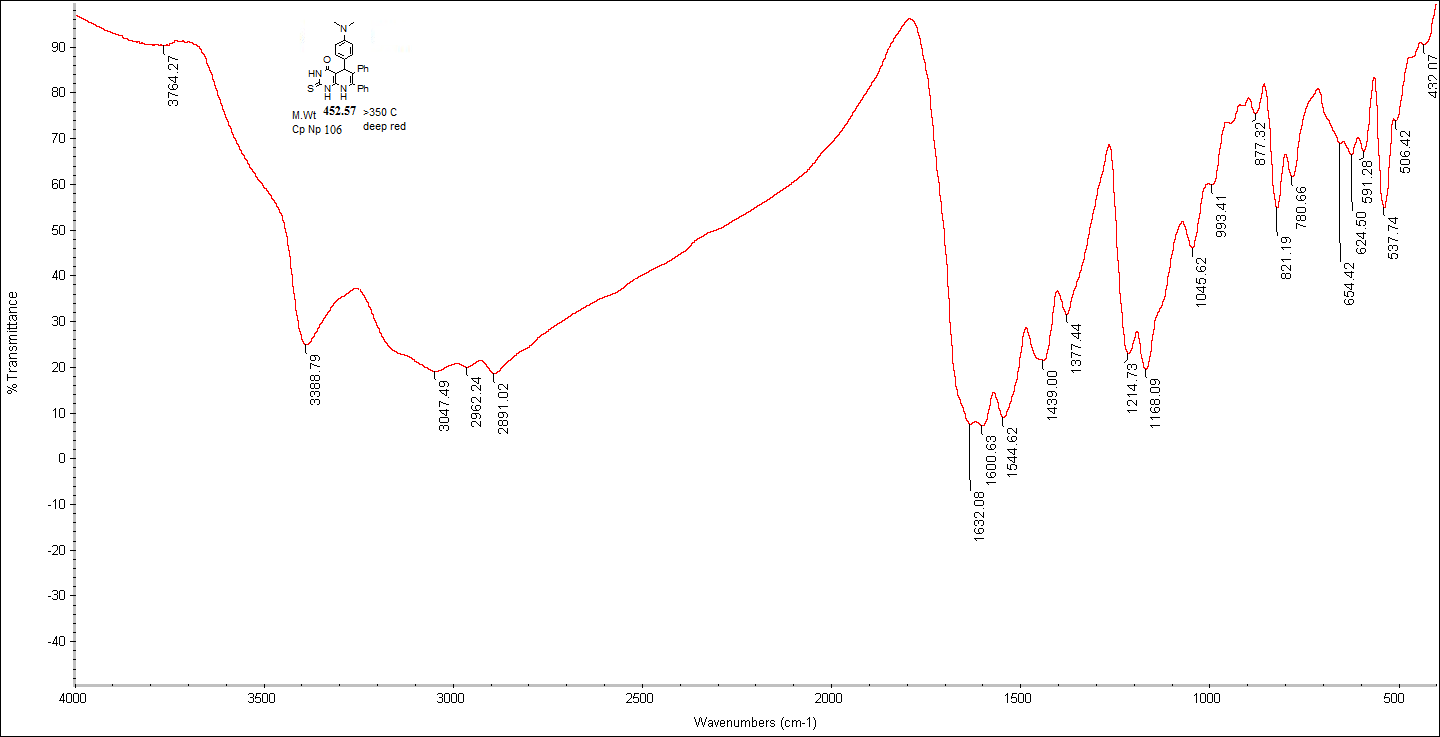
**

IR of compound **4c**

**
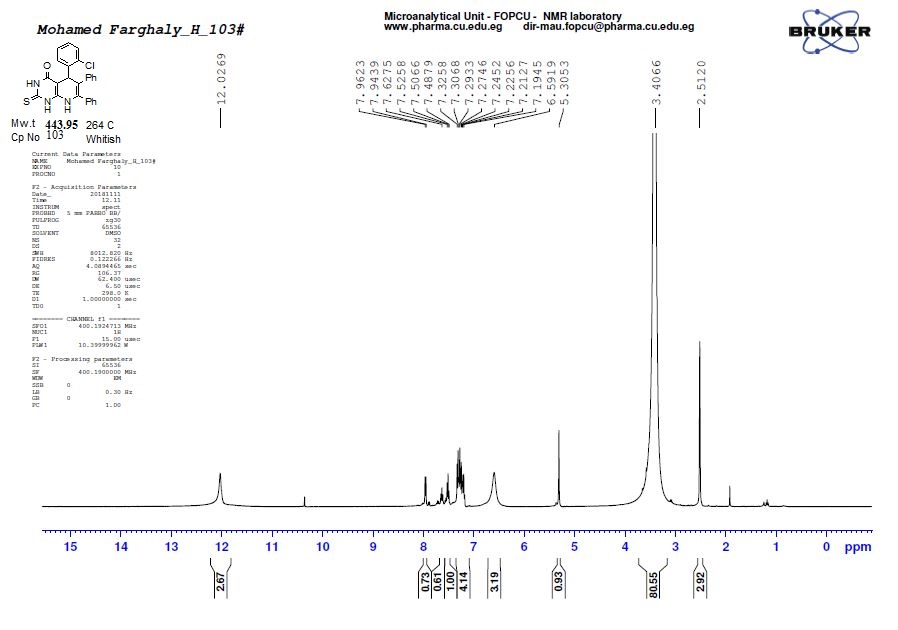
**

1HNMR of compound **4d**


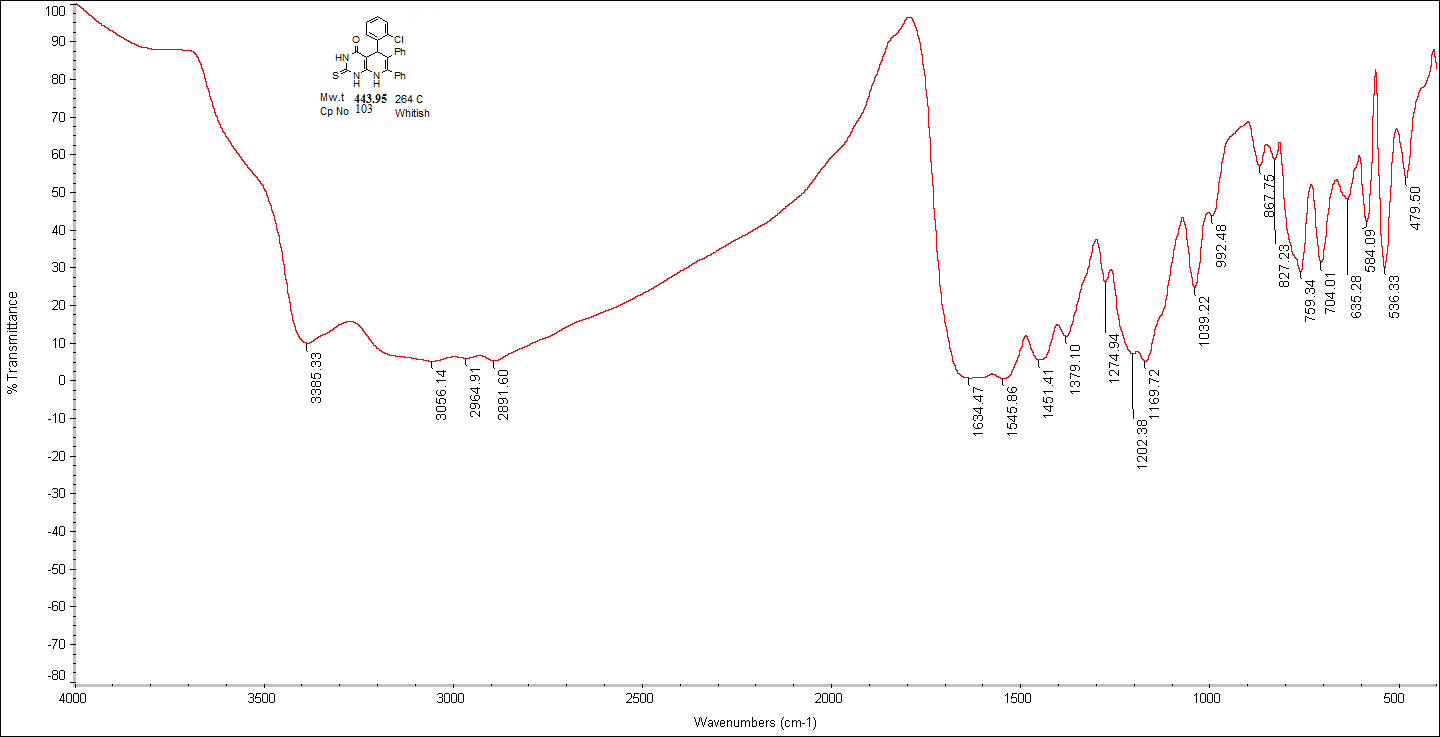


IR of compound **4d**


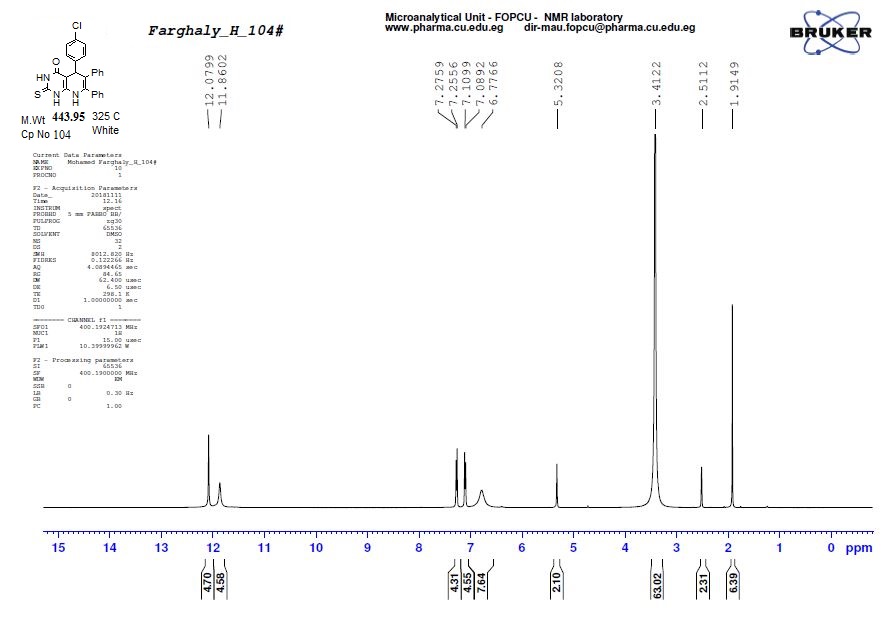


1HNMR of compound **4e**


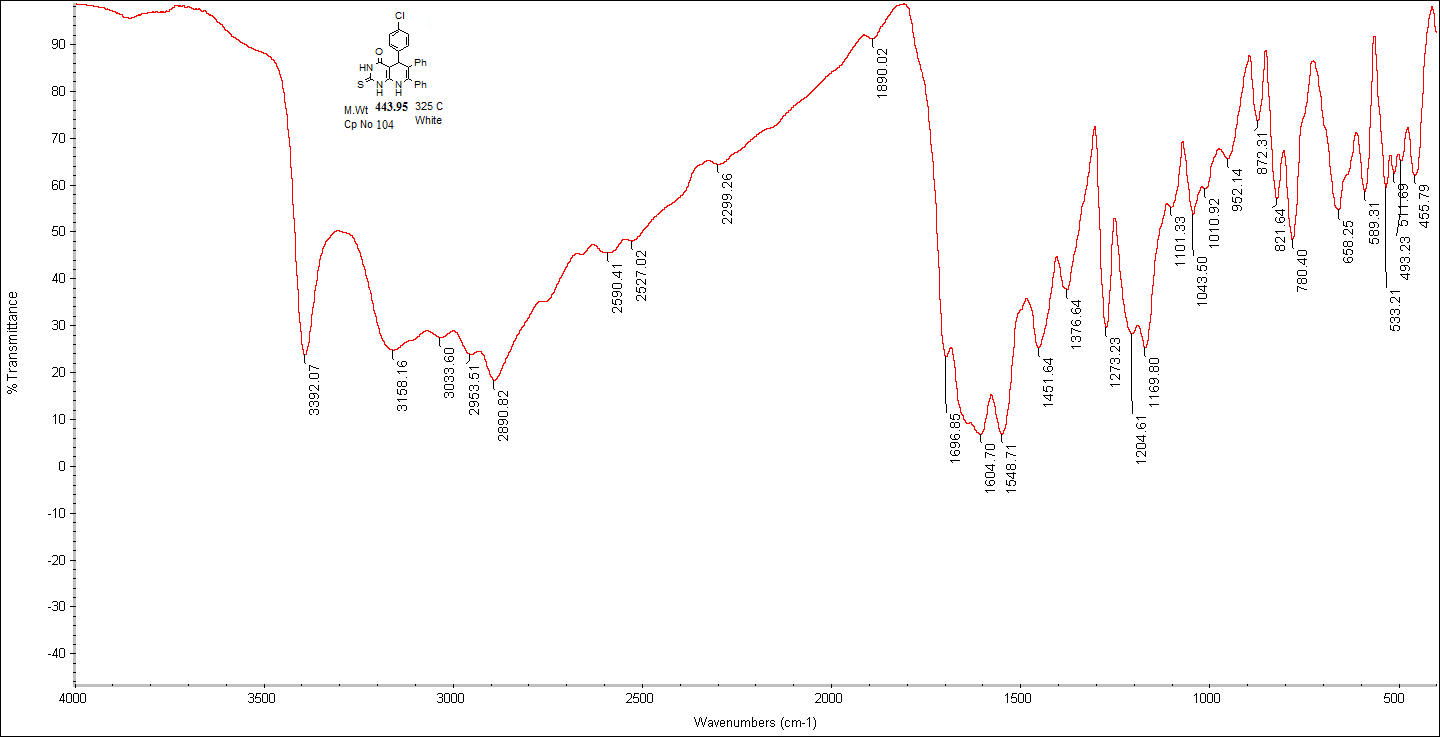


IR of compound **4e**

**
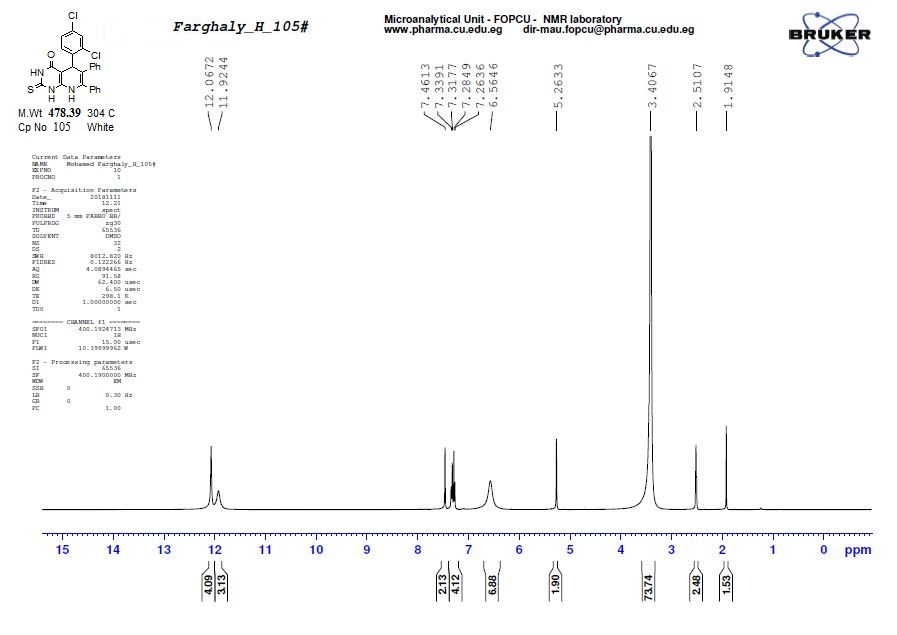
**

1HNMR of compound **4f**


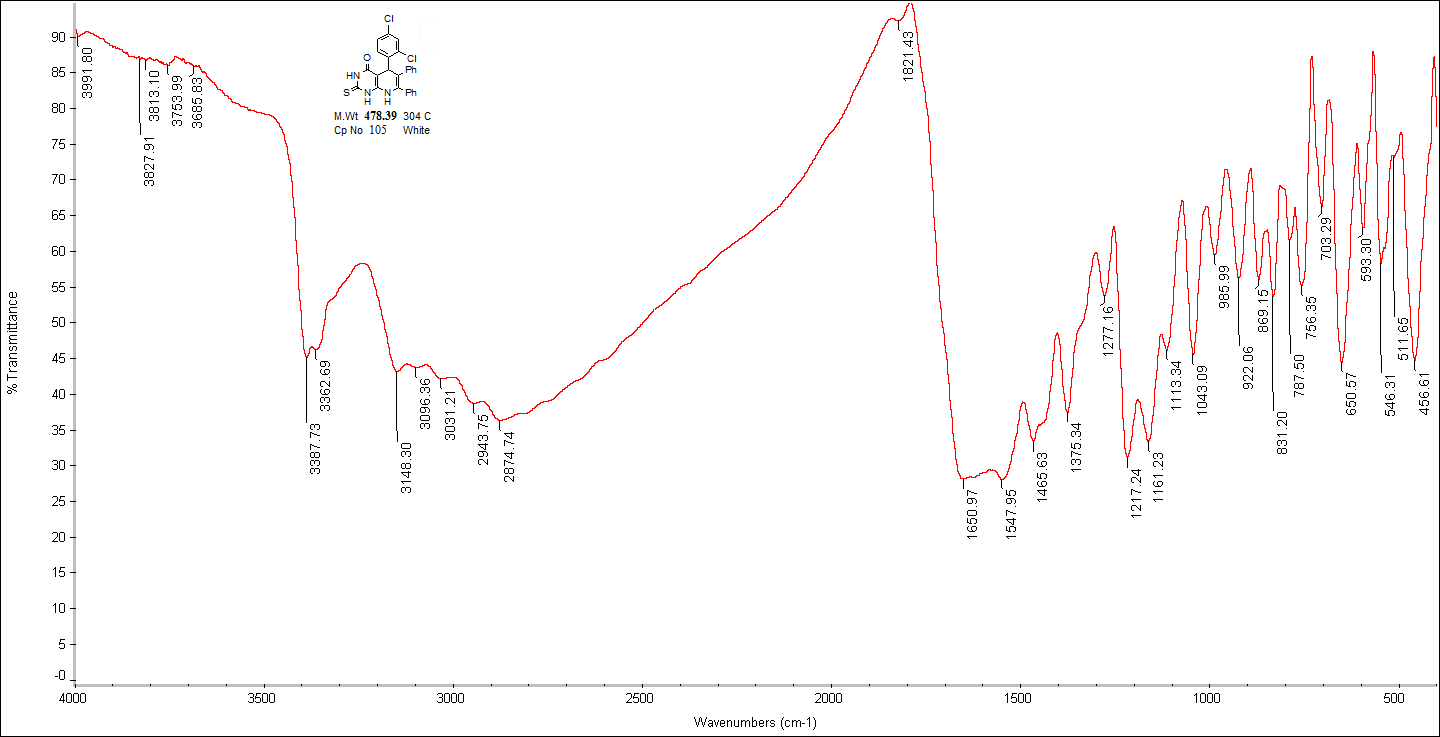


IR of compound **4f**

**
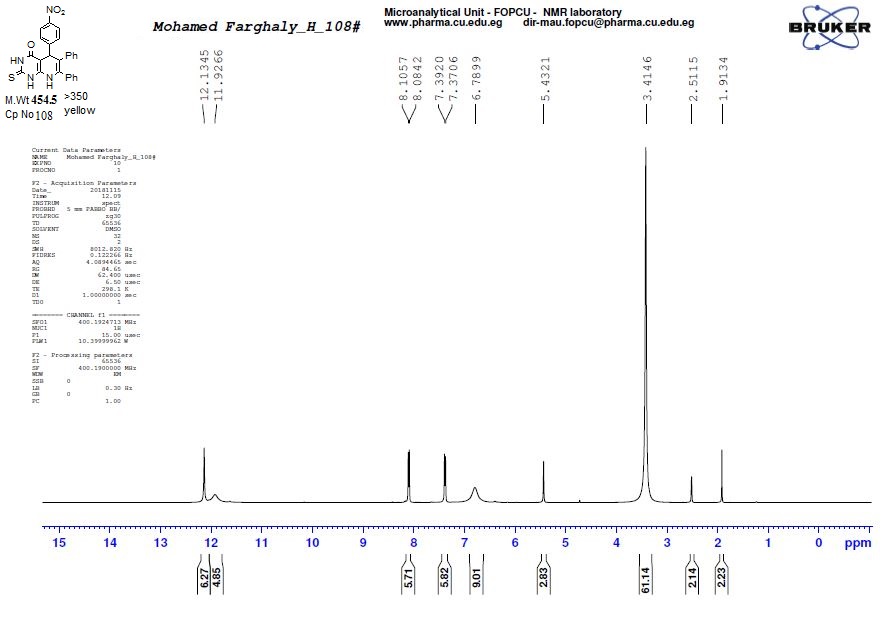
**

1HNMR of compound **4g**

**
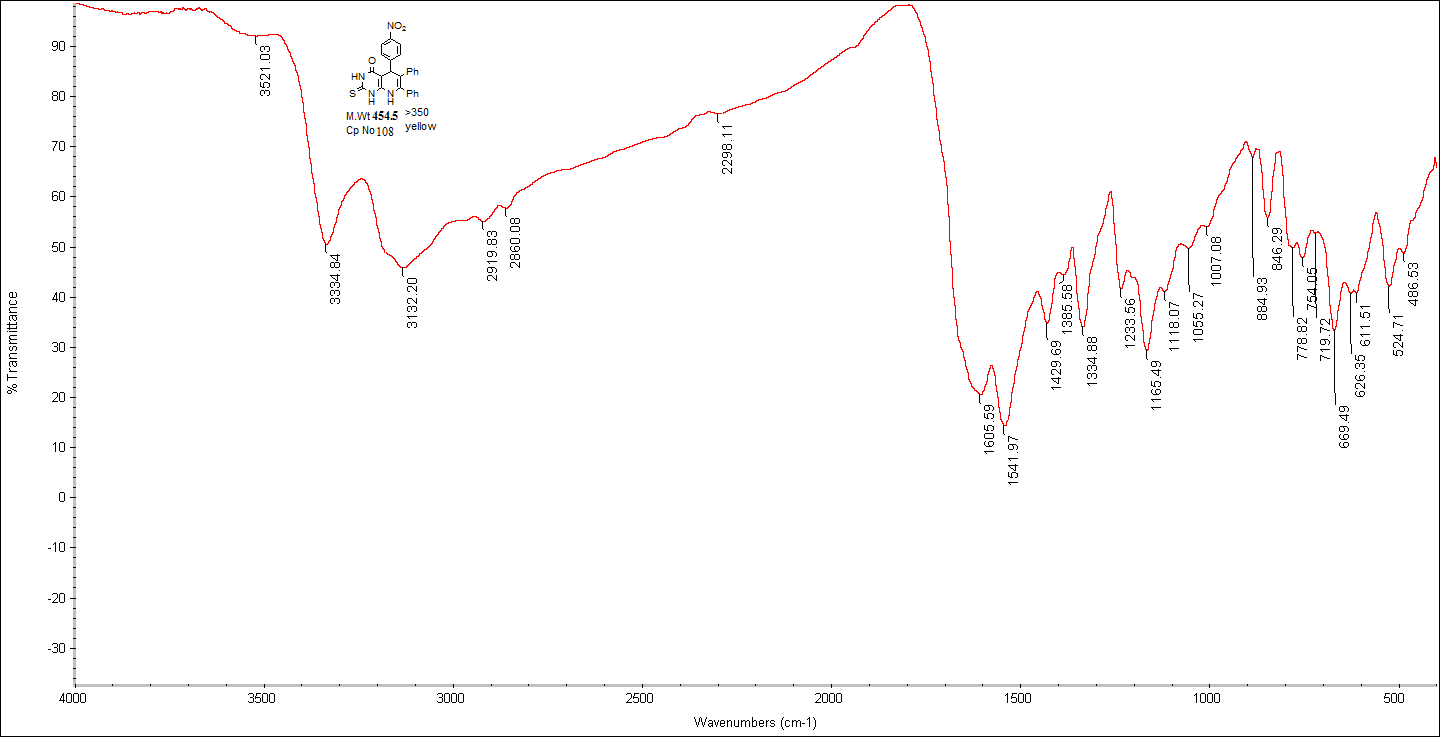
**

IR of compound **4g**

**
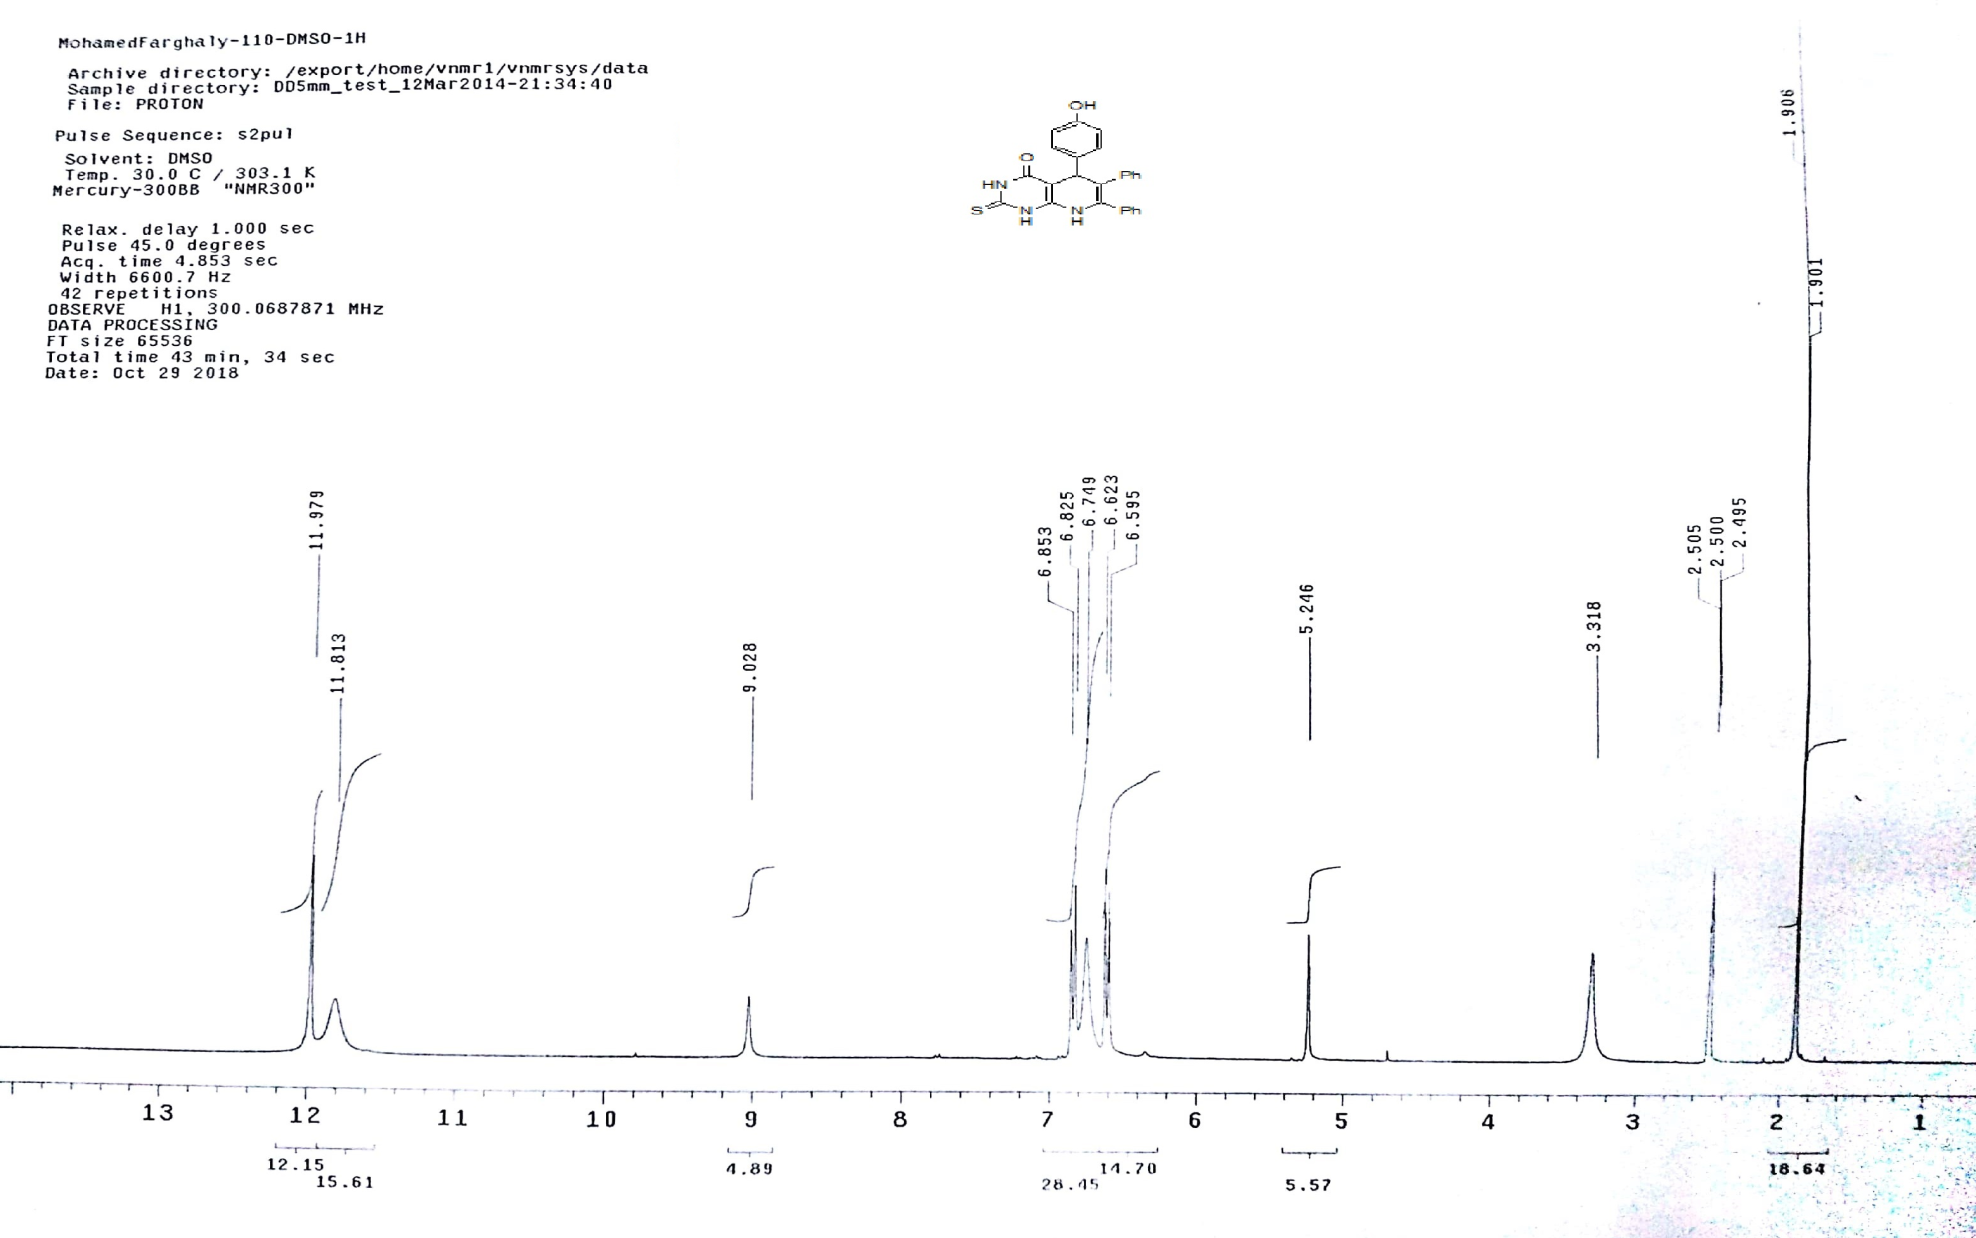
**

1HNMR of compound **4i**


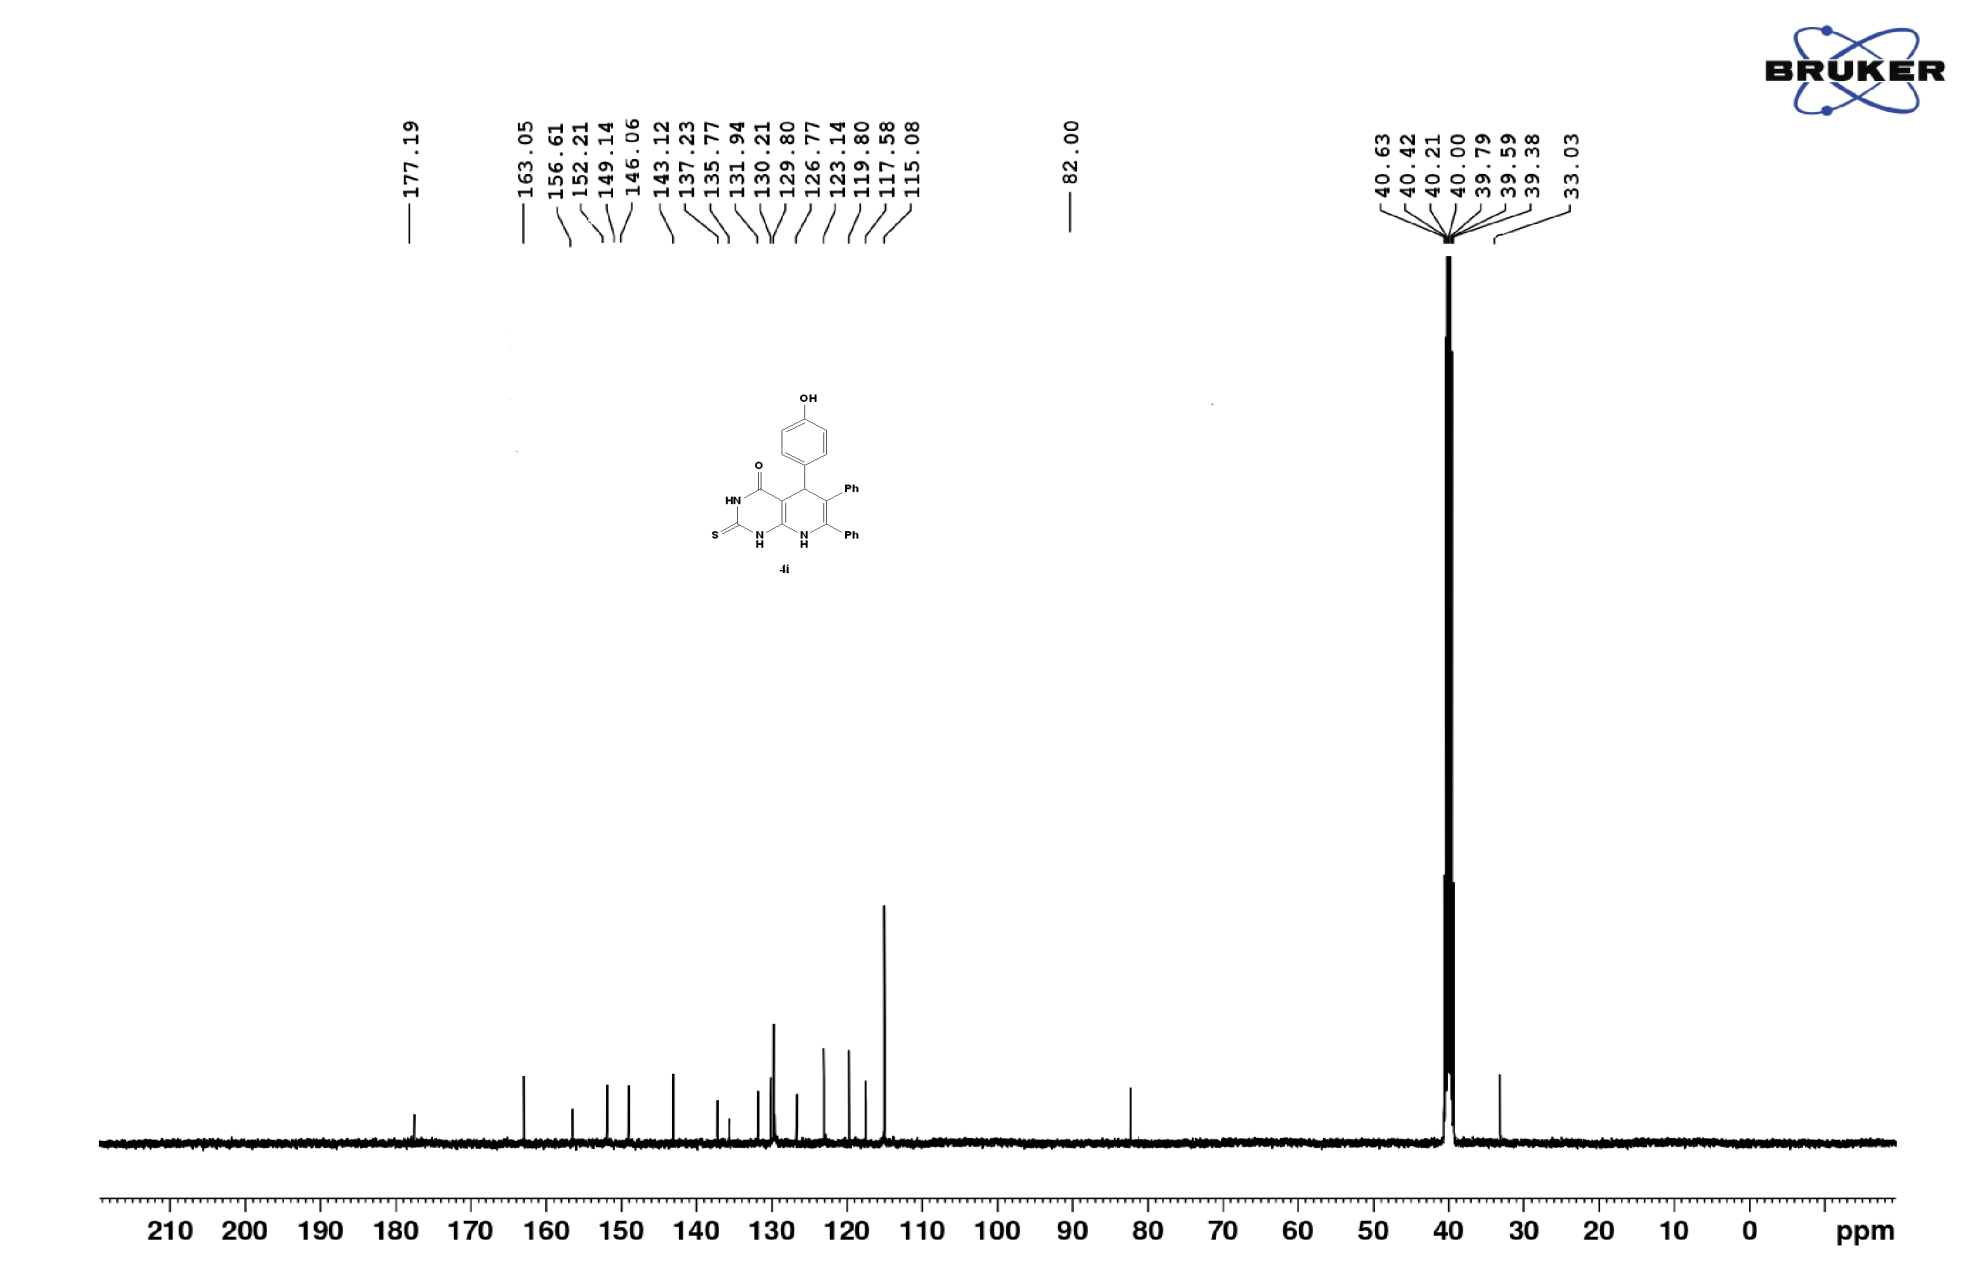


13CNMR of compound **4i**

**
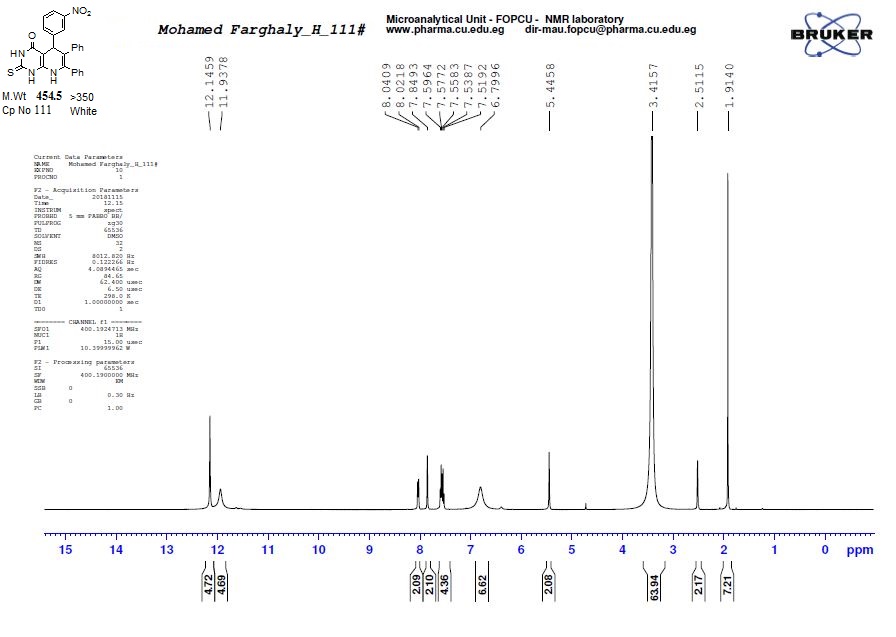
**

1HNMR of compound **4h**

**
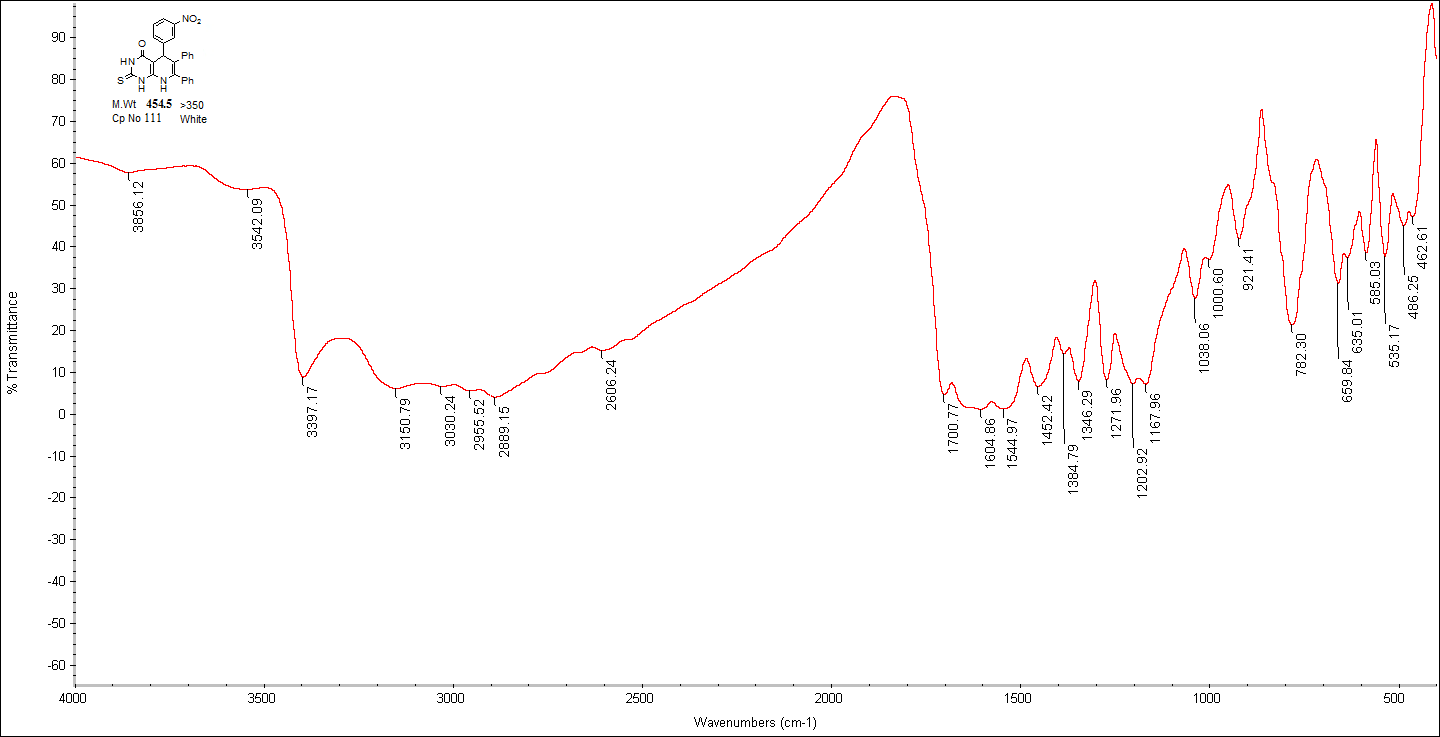
**

IR of compound **4h**

**
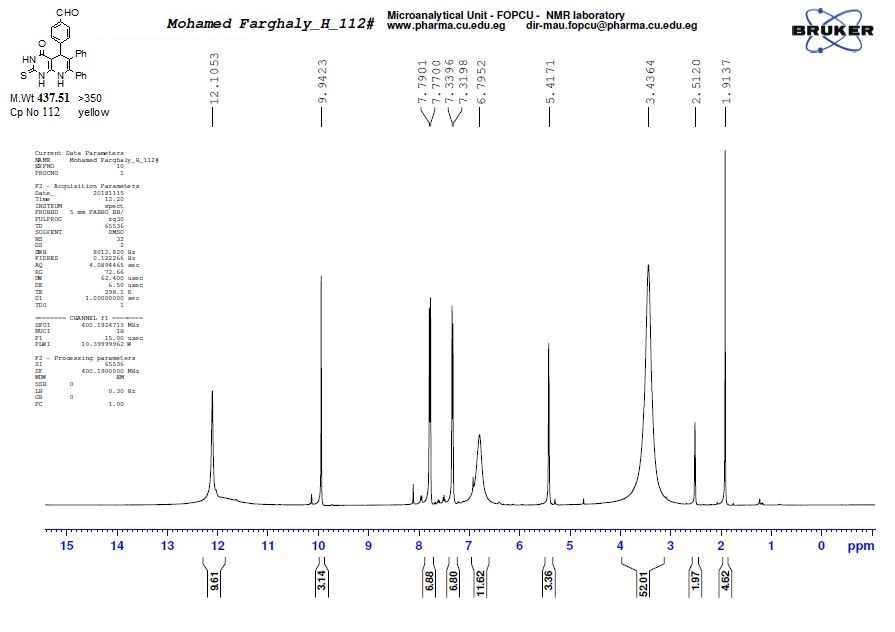
**

1HNMR of compound **4j**

**
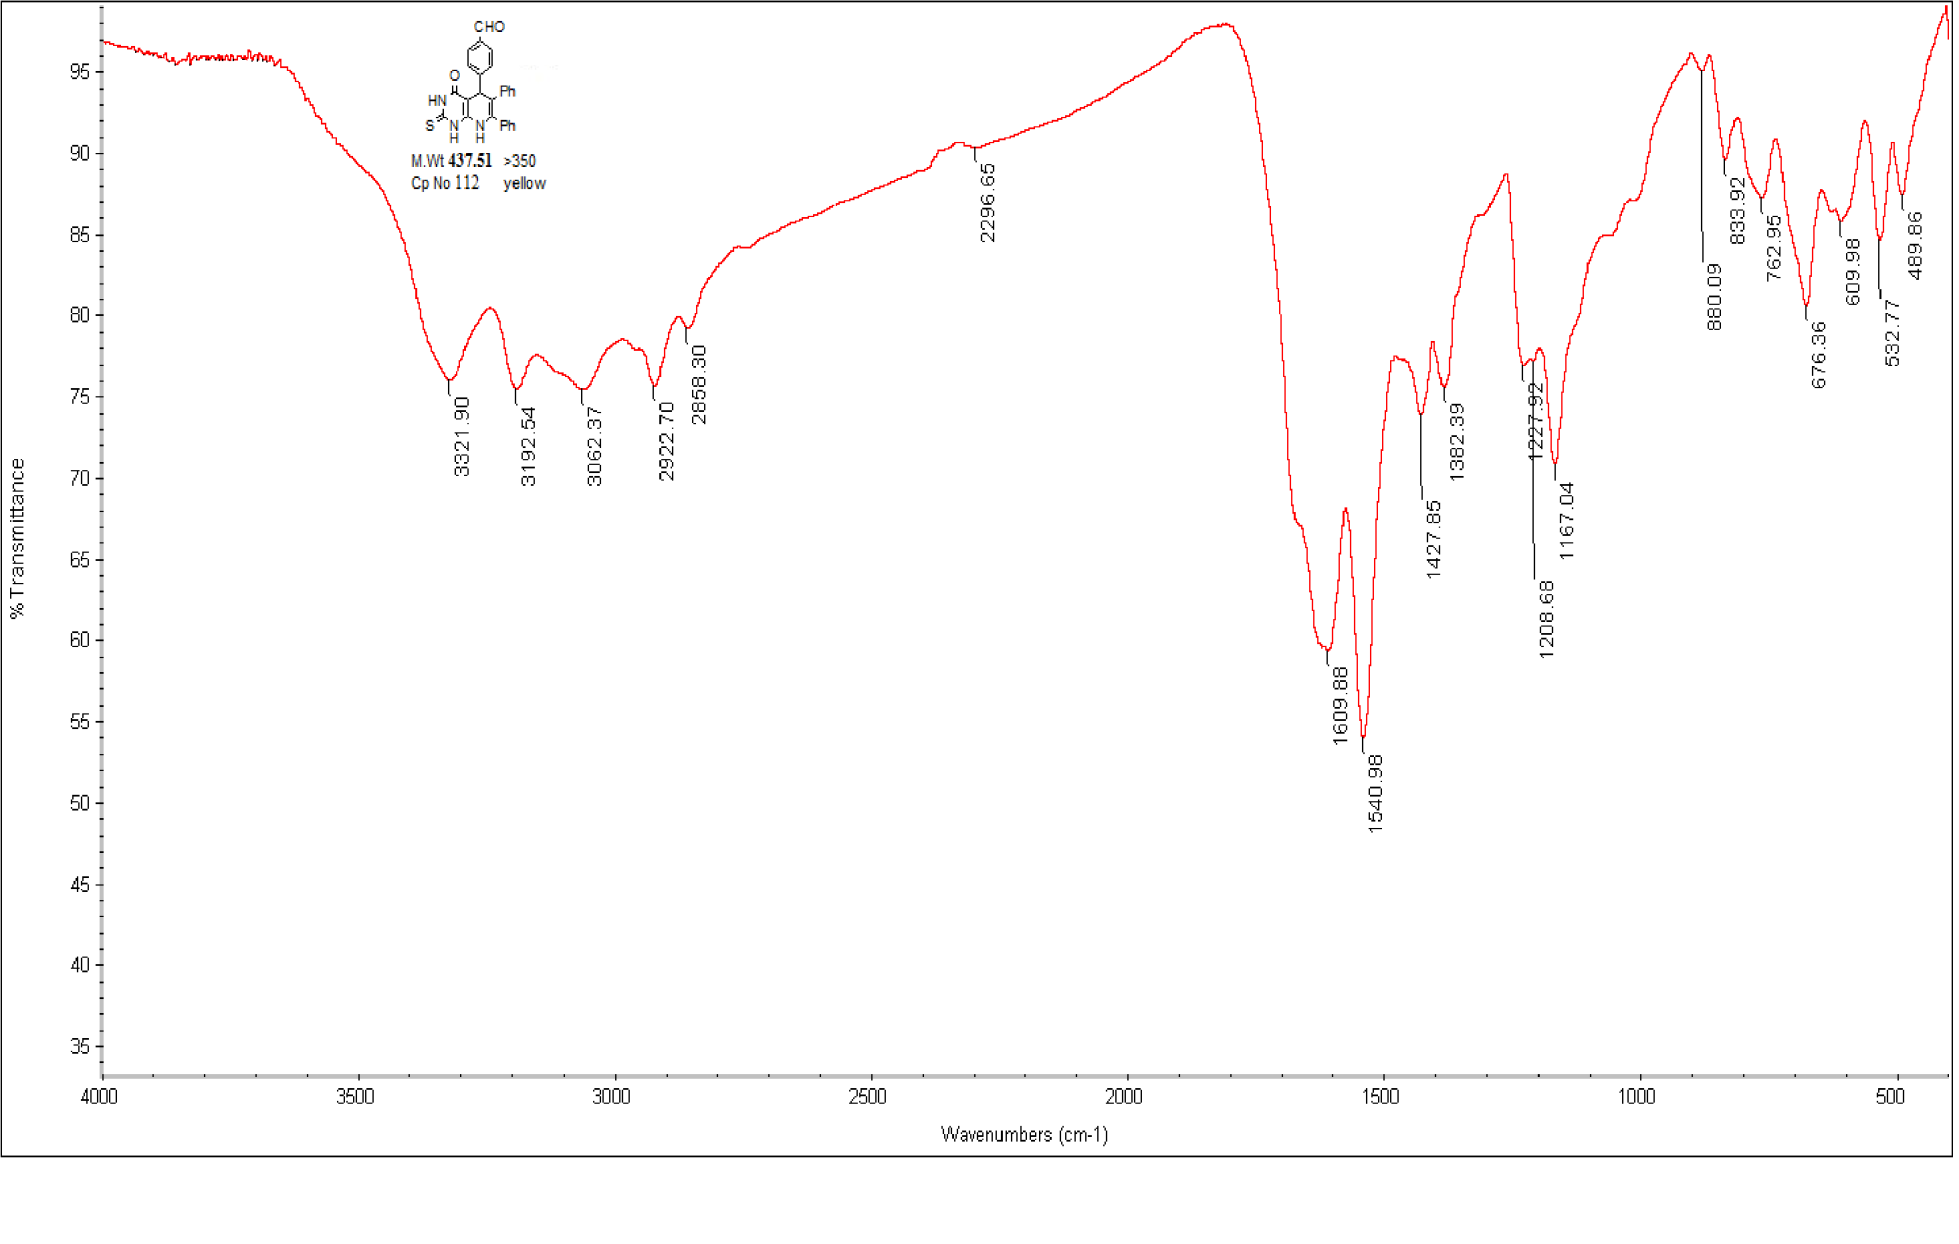
**

IR of compound **4j**

**
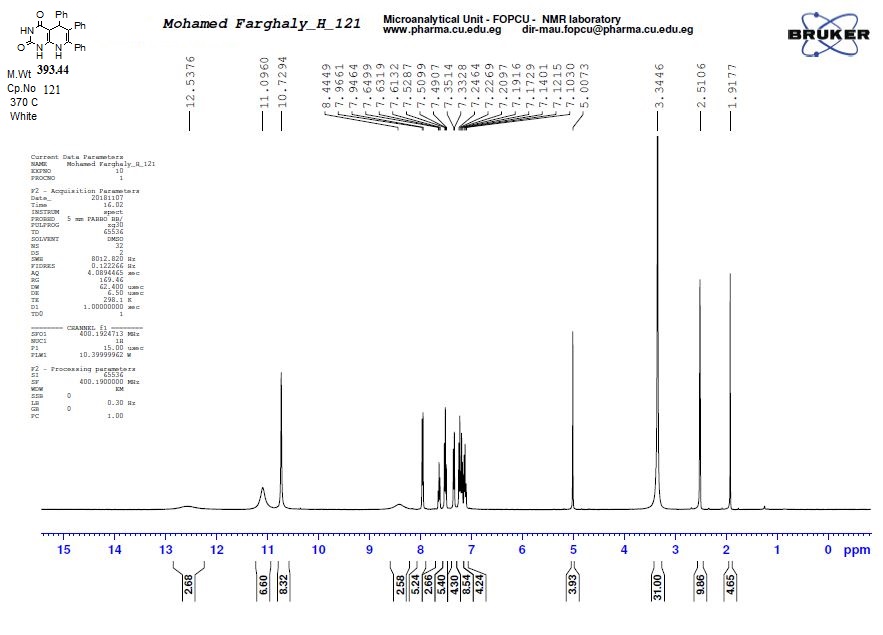
**

1HNMR of compound **4k**

**
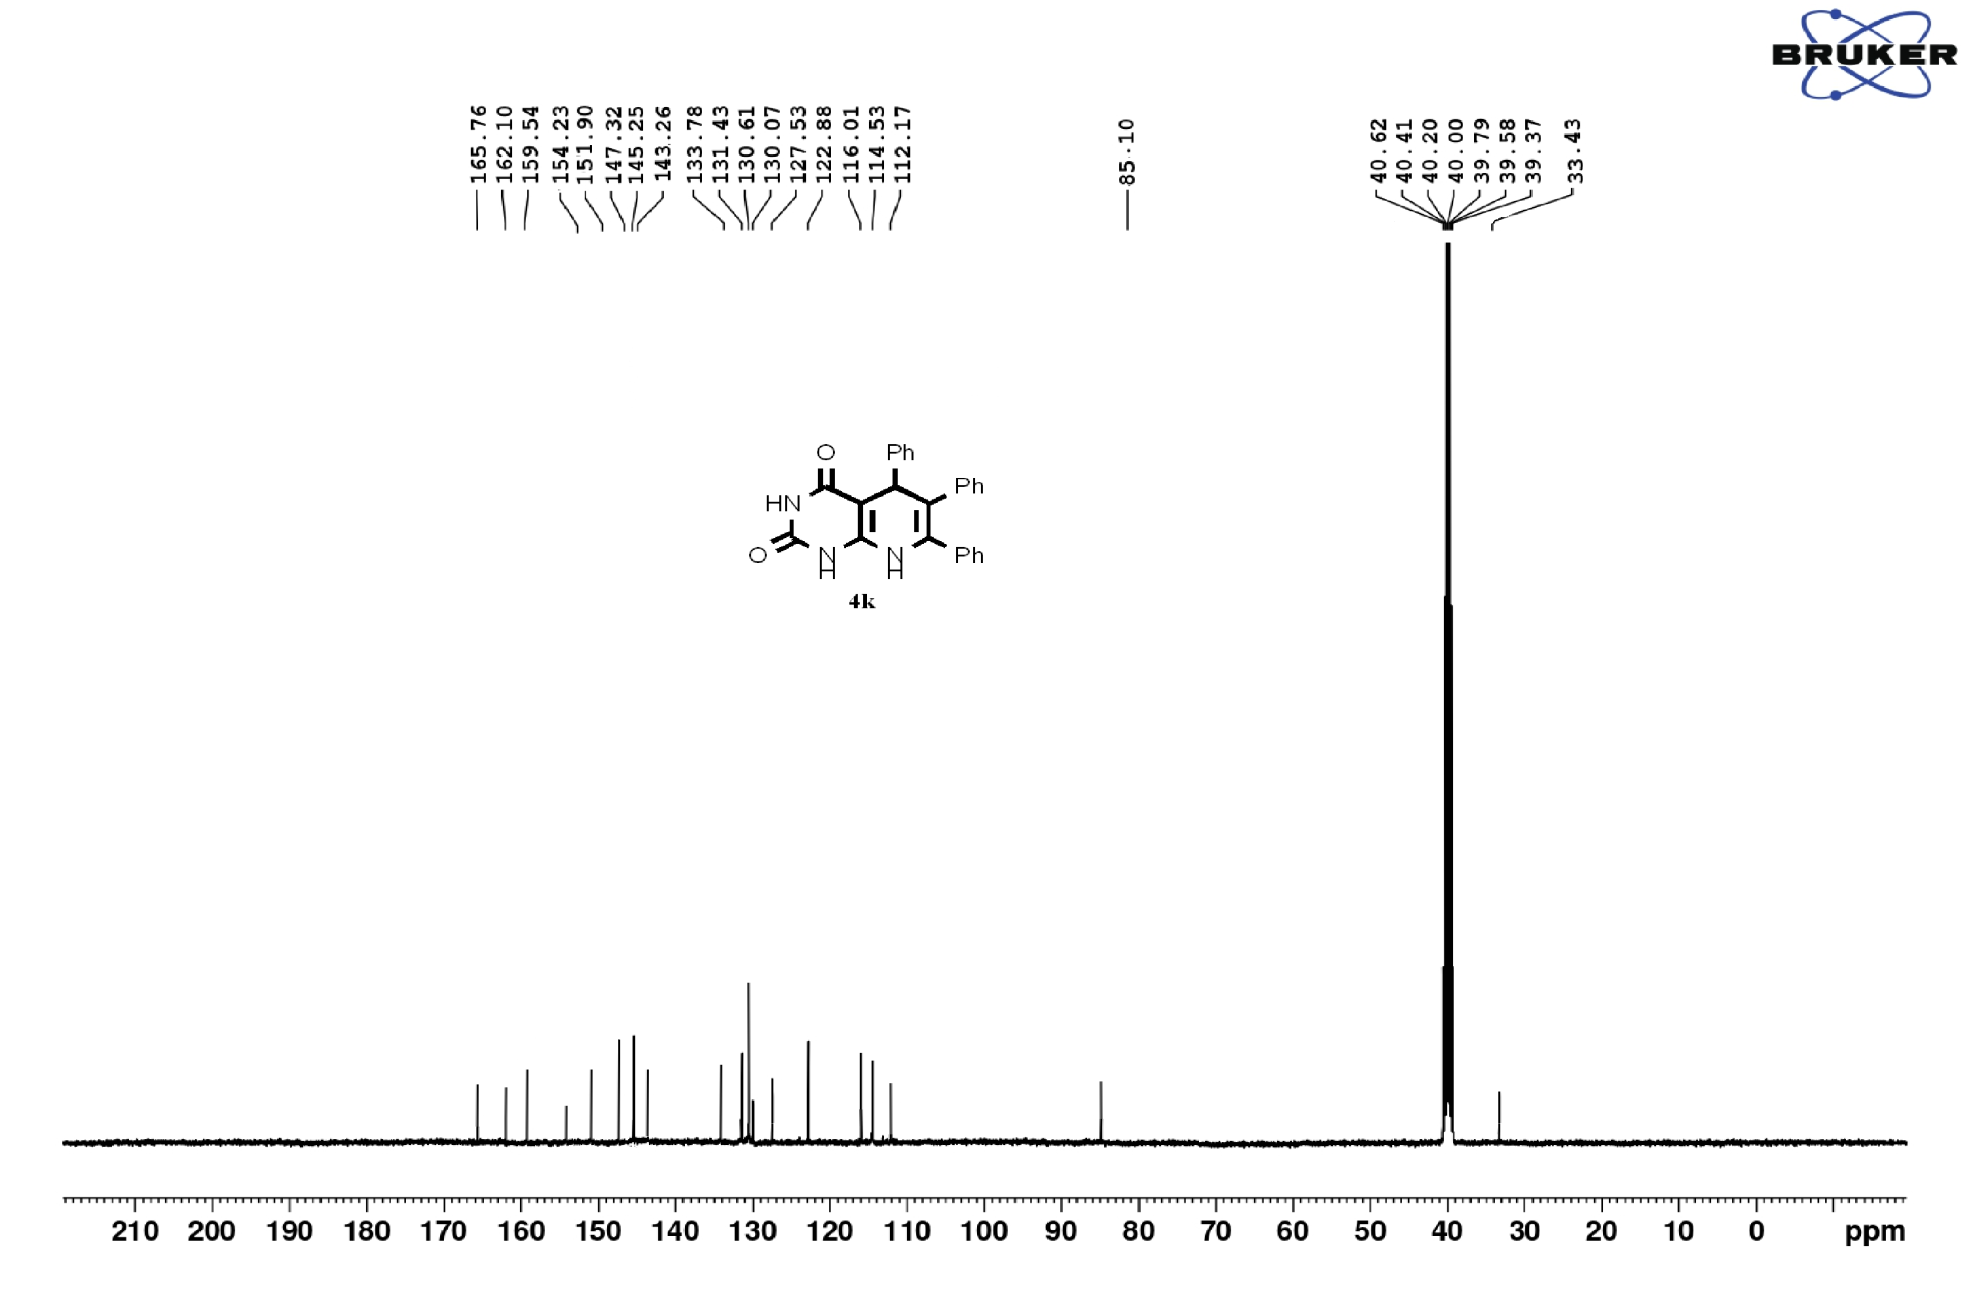
**

13CNMR of compound **4k**

**
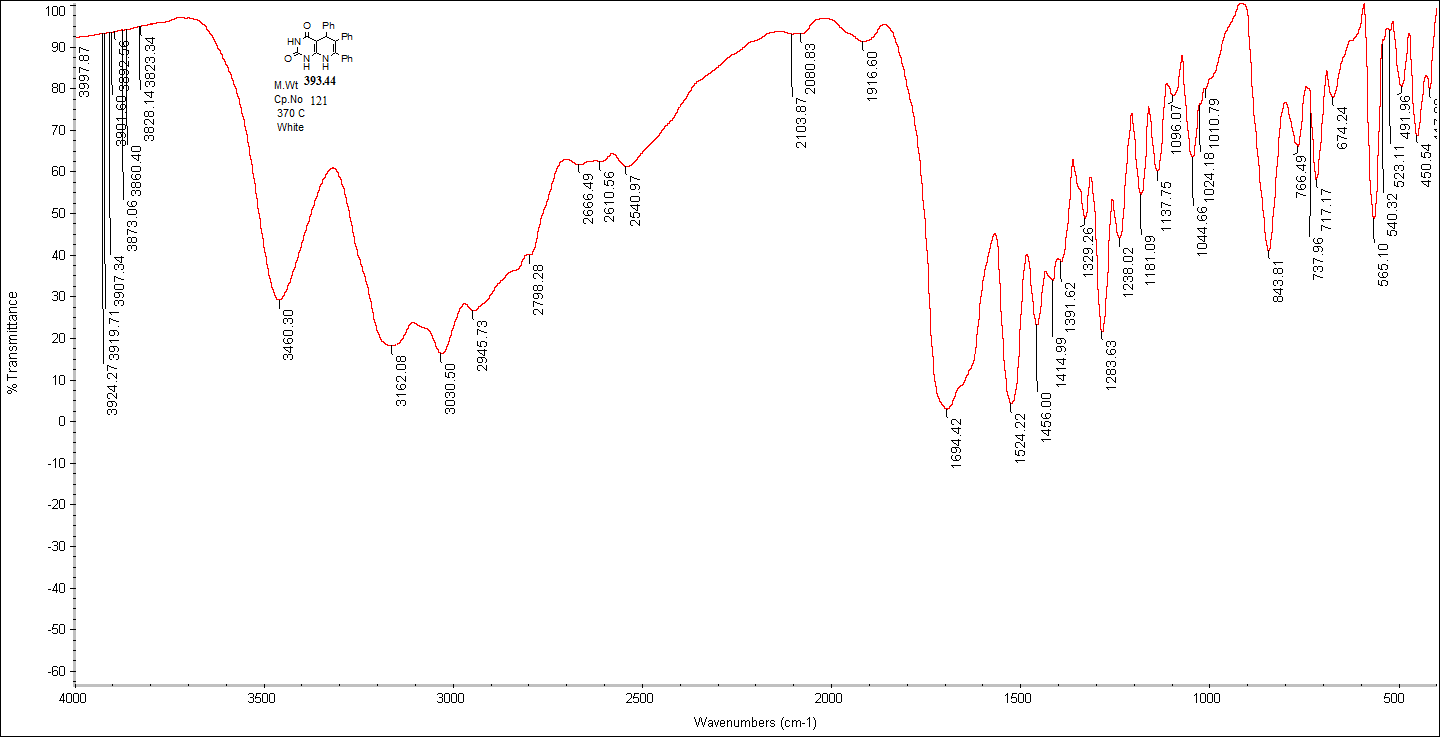
**

IR of compound **4k**

**
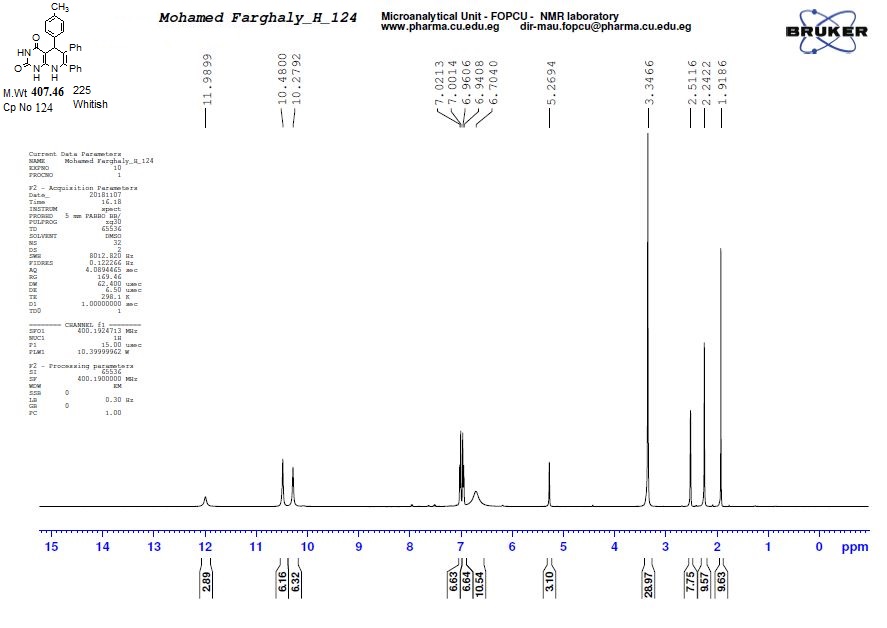
**

1HNMR of compound **4l**

**
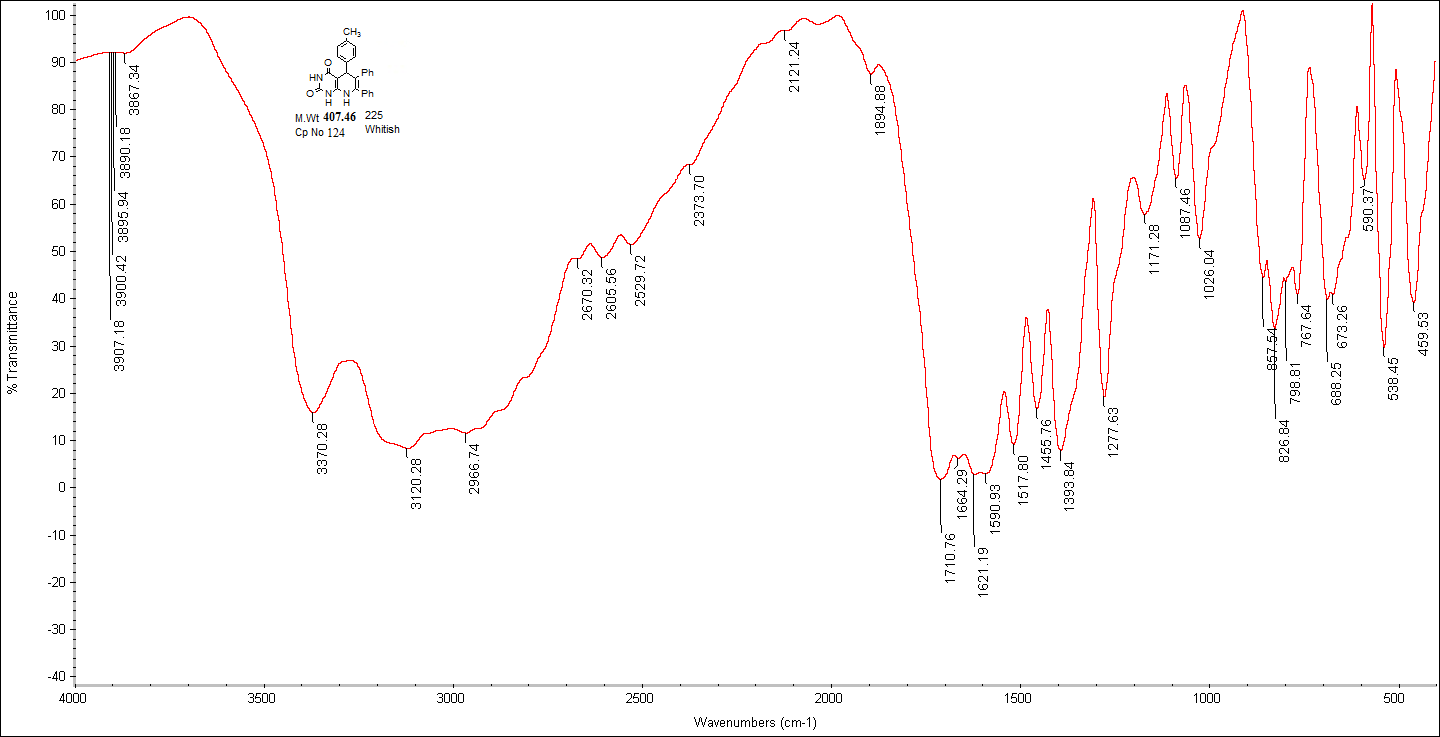
**

IR of compound **4l**

**
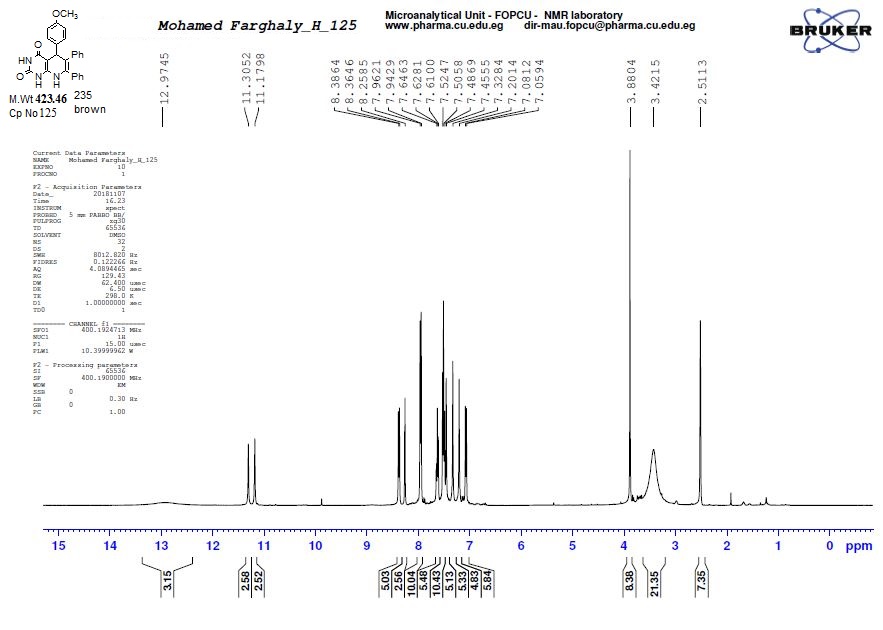
**

1HNMR of compound **4m**

**
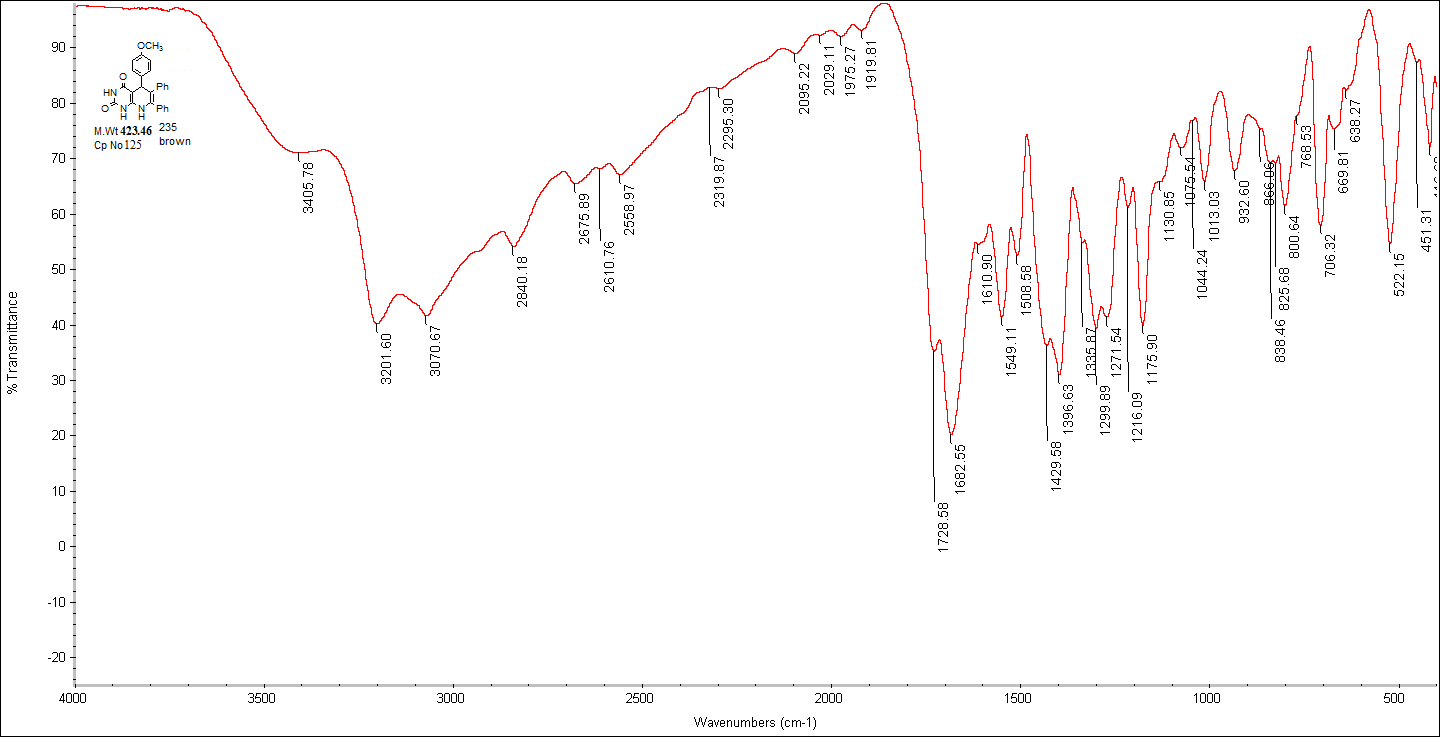
**

IR of compound **4m**

**
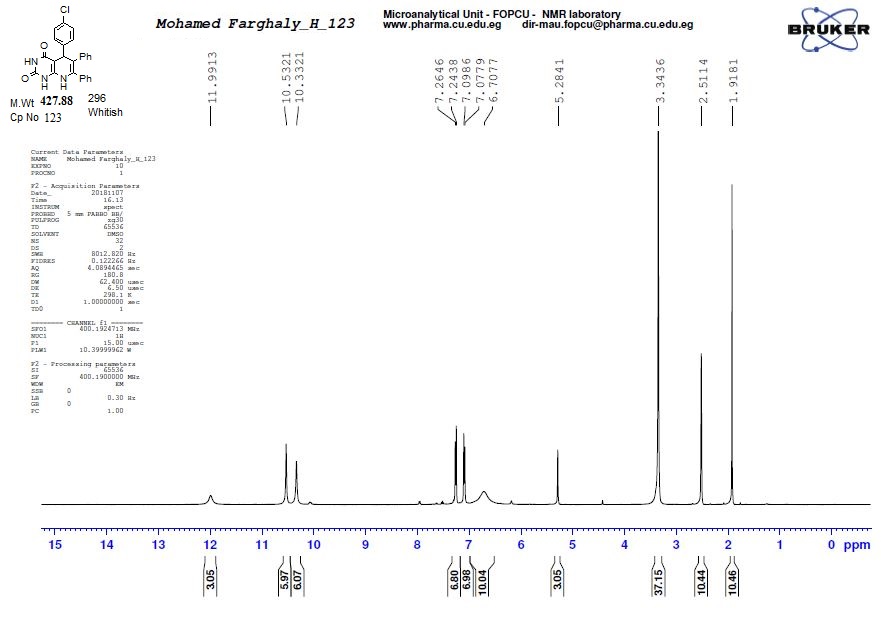
**

1HNMR of compound **4n**

**
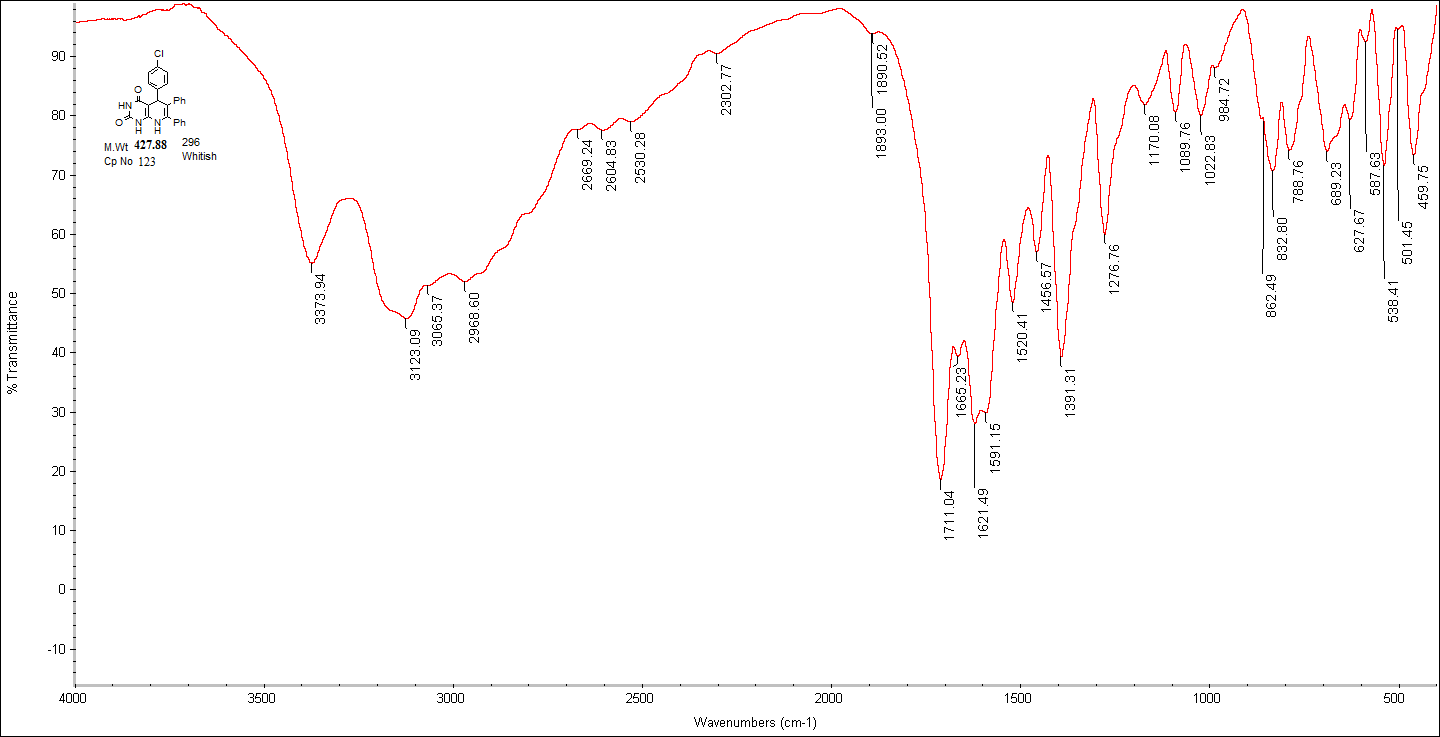
**

IR of compound **4n**

**
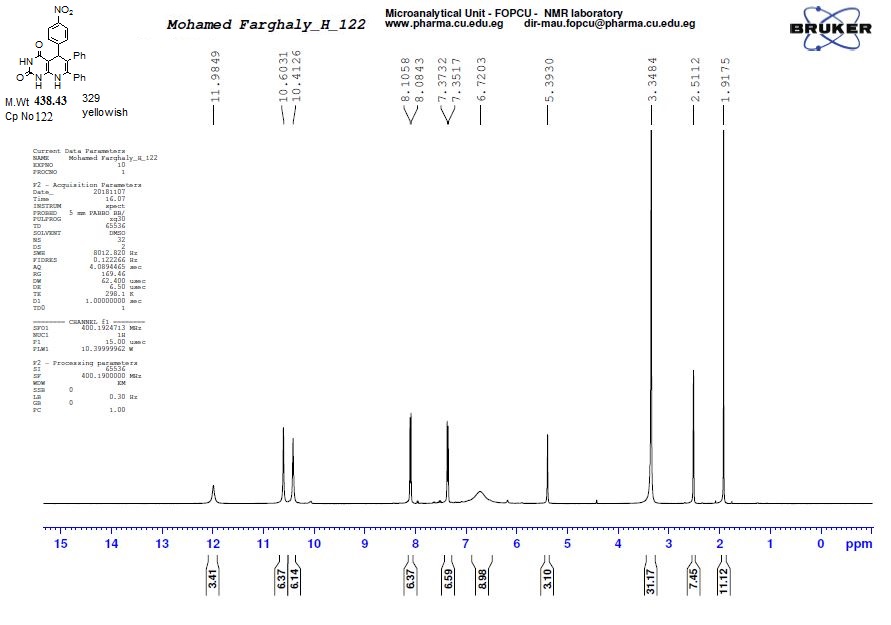
**

1HNMR of compound **4o**

**
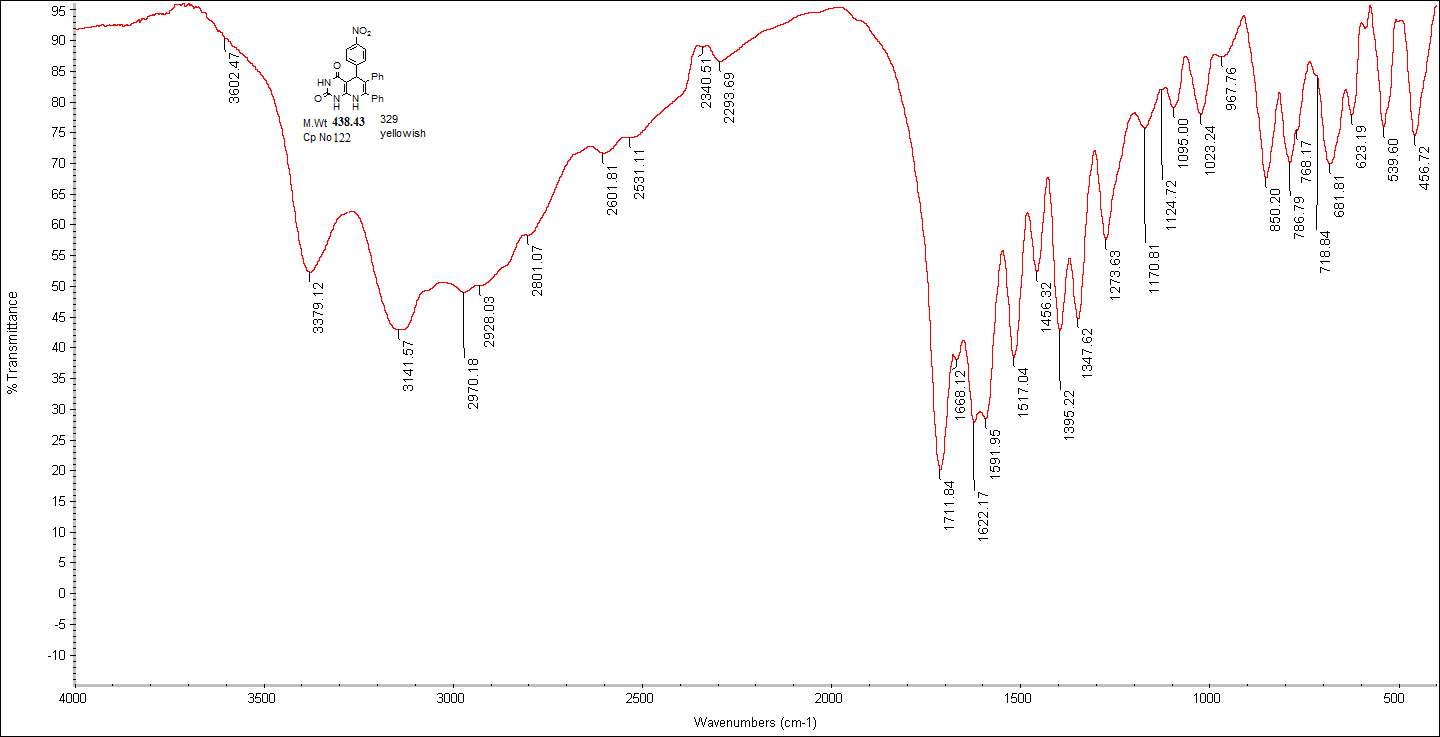
**

IR of compound **4o**


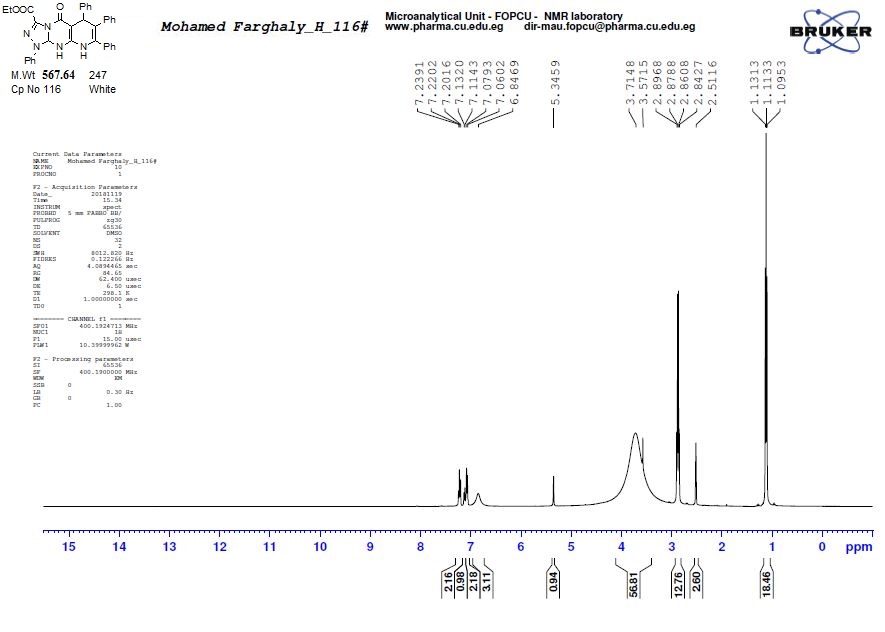


1HNMR of compound **6a**

**
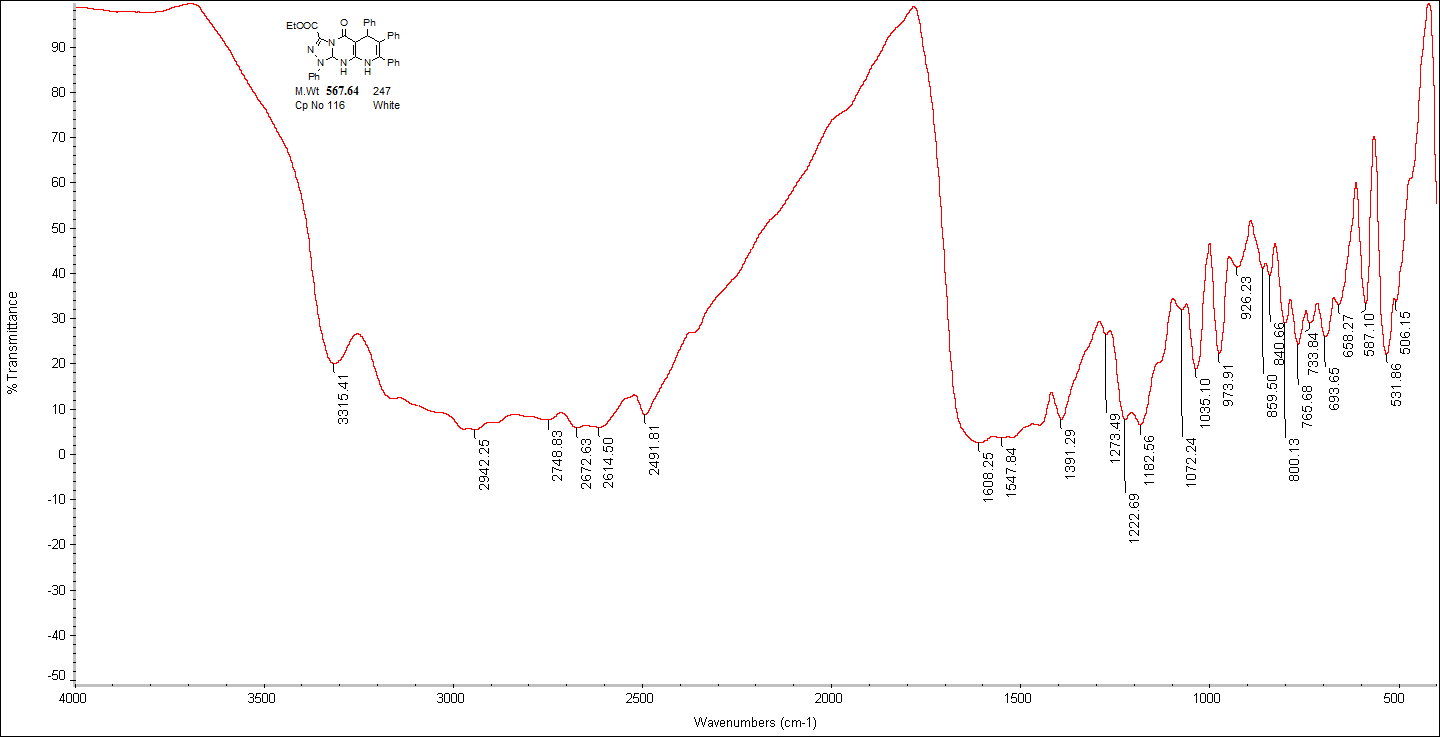
**

IR of compound **6a**

**
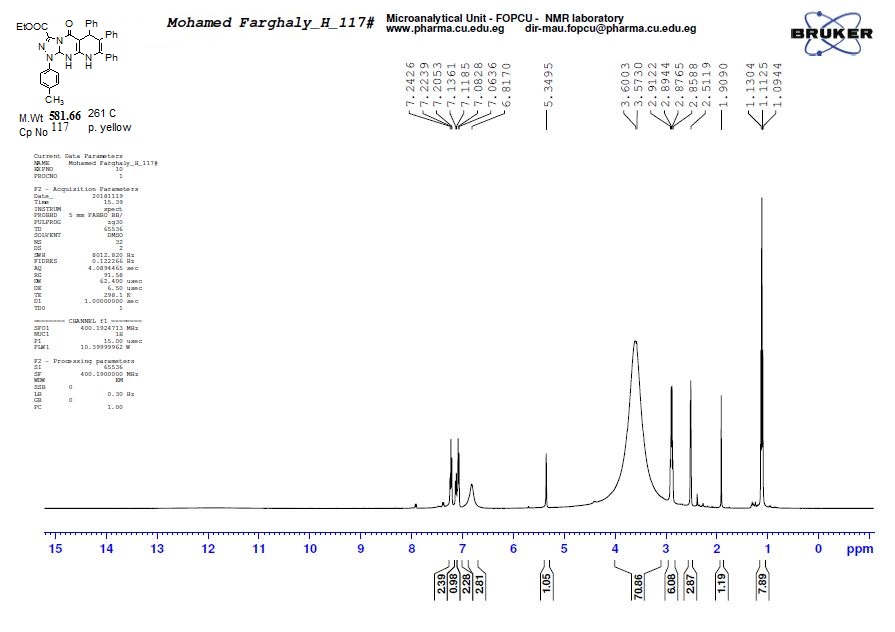
**

1HNMR of compound **6b**

**
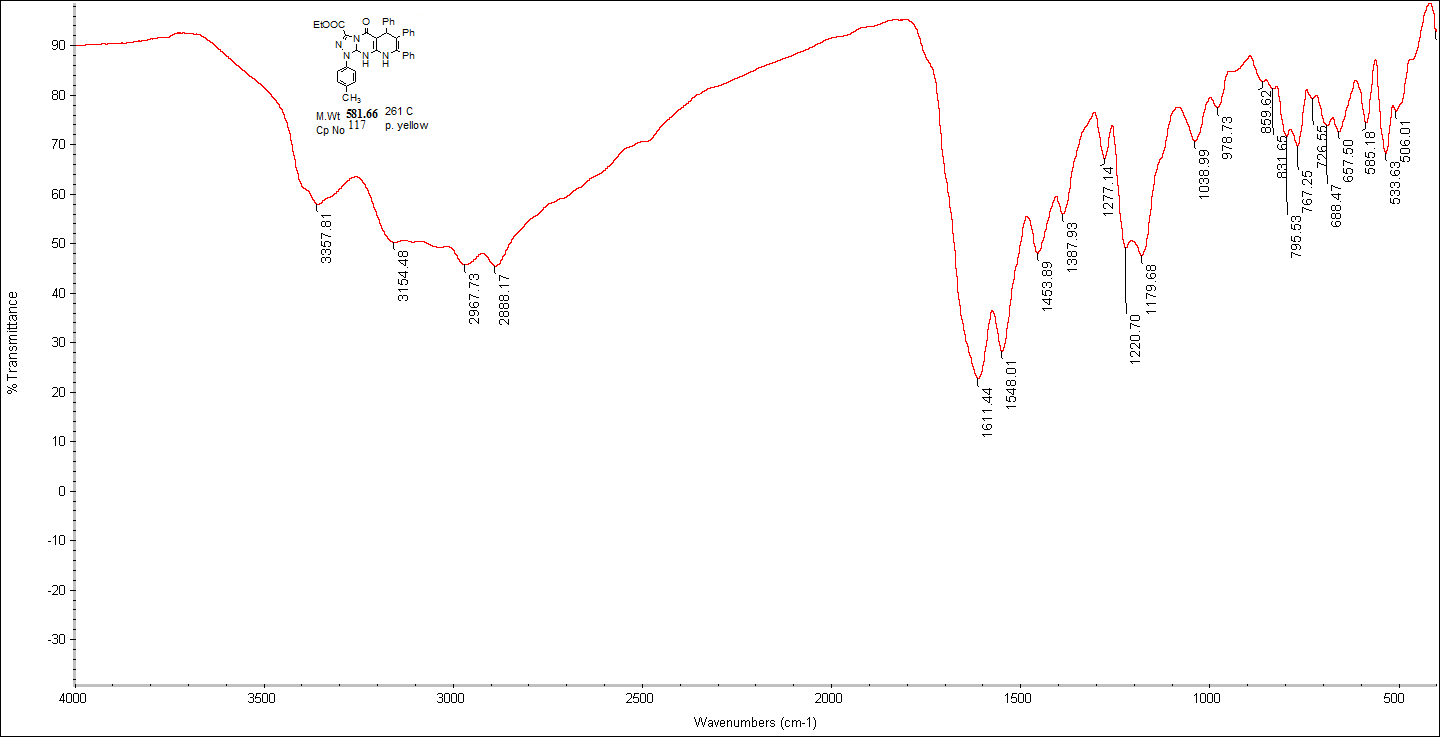
**

IR of compound **6b**

**
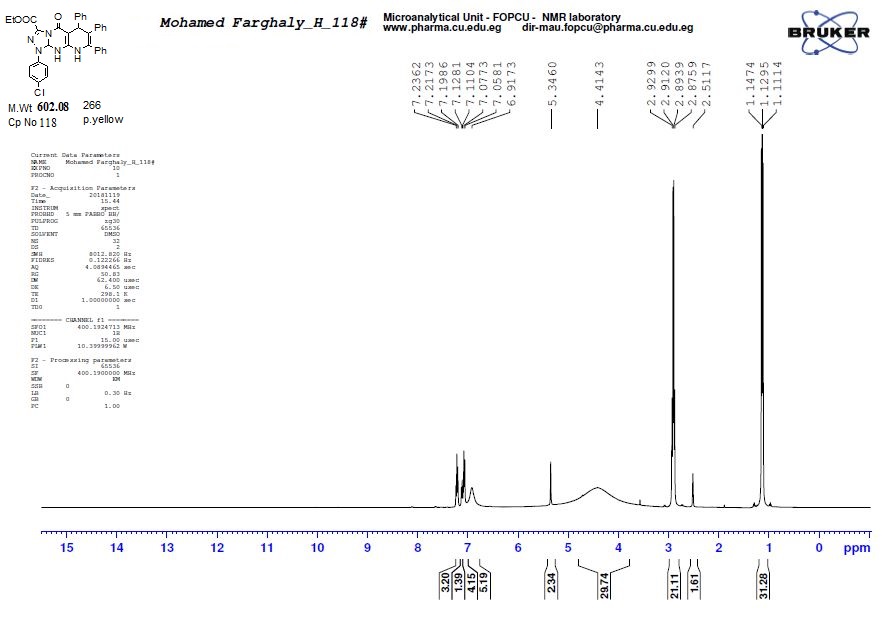
**

1HNMR of compound **6c**

**
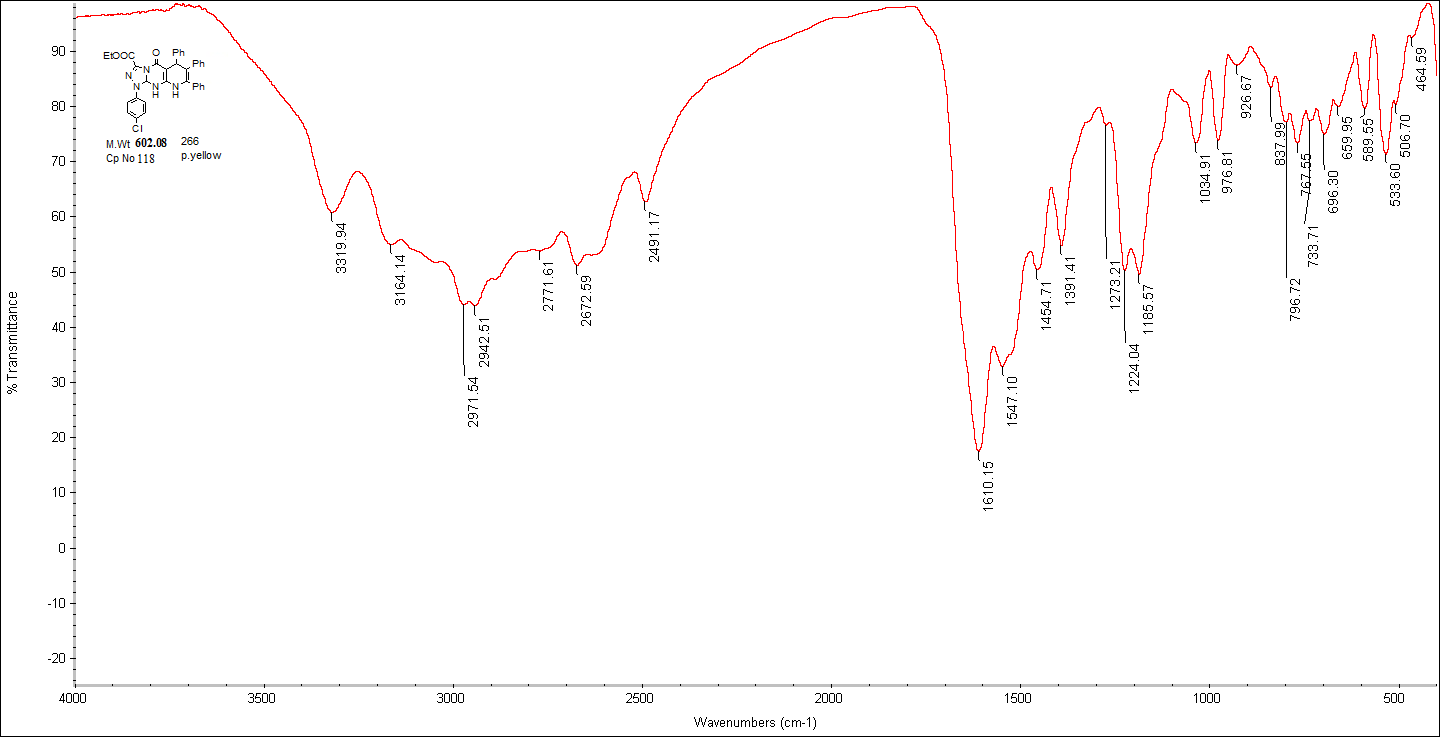
**

IR of compound **6c**
